# Supplementary material for: Unsymmetrical sulfoxides with sterically hindered catechol fragment: synthesis, structure, electrochemical properties, and antiradical activity
Source: publisher site journal article supplement (doi:10.3762/bjoc.22.65), 2026-06-01

## checkCIF/PLATON report

Structure factors have been supplied for datablock(s) lpg\_a

THIS REPORT IS FOR GUIDANCE ONLY. IF USED AS PART OF A REVIEW PROCEDURE FOR PUBLICATION, IT SHOULD NOT REPLACE THE EXPERTISE OF AN EXPERIENCED CRYSTALLOGRAPHIC REFEREE.

No syntax errors found. CIF dictionary Interpreting this report

**Datablock: lpg\_a**

|                 |                         |                                                            |
|-----------------|-------------------------|------------------------------------------------------------|
| Bond precision: | C-C = 0.0094 Å          | Wavelength=0.71073                                         |
| Cell:           | a=10.419(8)<br>alpha=90 | b=29.386(16)<br>beta=101.33(3)<br>c=15.691(10)<br>gamma=90 |
| Temperature:    | 293 K                   |                                                            |
|                 | Calculated              | Reported                                                   |
| Volume          | 4711(5)                 | 4711(5)                                                    |
| Space group     | P 21/n                  | P 1 21/n 1                                                 |
| Hall group      | -P 2yn                  | -P 2yn                                                     |
| Moiety formula  | 8(C19 H30 O3 S), C6 H14 | 8(C19 H30 O3 S), C6 H14                                    |
| Sum formula     | C158 H254 O24 S8        | C158 H254 O24 S8                                           |
| Mr              | 2794.09                 | 2794.08                                                    |
| Dx, g cm-3      | 0.985                   | 0.985                                                      |
| Z               | 1                       | 1                                                          |
| Mu (mm-1)       | 0.149                   | 0.149                                                      |
| F000            | 1522.0                  | 1522.0                                                     |
| F000'           | 1523.62                 |                                                            |
| h,k,lmax        | 12,35,19                | 12,35,19                                                   |
| Nref            | 8947                    | 8917                                                       |
| Tmin,Tmax       | 0.968,0.988             | 0.573,0.747                                                |
| Tmin'           | 0.901                   |                                                            |

Correction method= # Reported T Limits: Tmin=0.573 Tmax=0.747  
AbsCorr = MULTI SCAN

Data completeness= 0.997                      Theta (max)= 25.682

```
R(reflections)= 0.1158( 5979)      wR2(reflections)=
S = 1.151                        0.2965( 8917)
Npar= 512
```

---

The following ALERTS were generated. Each ALERT has the format

**test-name\_ALERT\_alert-type\_alert-level.**

Click on the hyperlinks for more details of the test.

---

### Alert level B

PLAT049\_ALERT\_1\_B Calculated Density Less Than 1.0 gcm-3 ..... 0.9849 Check

---

### Alert level C

PLAT082\_ALERT\_2\_C High R1 Value ..... 0.12 Report  
PLAT084\_ALERT\_3\_C High wR2 Value (i.e. > 0.25) ..... 0.30 Report  
PLAT094\_ALERT\_2\_C Ratio of Maximum / Minimum Residual Density .... 3.02 Report  
PLAT220\_ALERT\_2\_C NonSolvent Resd 1 C Ueq(max)/Ueq(min) Range 3.9 Ratio  
PLAT220\_ALERT\_2\_C NonSolvent Resd 2 C Ueq(max)/Ueq(min) Range 4.8 Ratio  
PLAT230\_ALERT\_2\_C Hirshfeld Test Diff for C15 --C16 . 6.1 s.u.  
PLAT230\_ALERT\_2\_C Hirshfeld Test Diff for C15 --C19 . 5.2 s.u.  
PLAT234\_ALERT\_4\_C Large Hirshfeld Difference C34 --C38 . 0.20 Ang.  
PLAT234\_ALERT\_4\_C Large Hirshfeld Difference C34 --C38A . 0.19 Ang.  
PLAT234\_ALERT\_4\_C Large Hirshfeld Difference C37 --C38 . 0.16 Ang.  
PLAT241\_ALERT\_2\_C High 'MainMol' Ueq as Compared to Neighbors of C16 Check  
PLAT241\_ALERT\_2\_C High 'MainMol' Ueq as Compared to Neighbors of C18 Check  
PLAT242\_ALERT\_2\_C Low 'MainMol' Ueq as Compared to Neighbors of C26 Check  
PLAT242\_ALERT\_2\_C Low 'MainMol' Ueq as Compared to Neighbors of C30 Check  
PLAT242\_ALERT\_2\_C Low 'MainMol' Ueq as Compared to Neighbors of S1 Check  
PLAT242\_ALERT\_2\_C Low 'MainMol' Ueq as Compared to Neighbors of C7 Check  
PLAT242\_ALERT\_2\_C Low 'MainMol' Ueq as Compared to Neighbors of C15 Check  
PLAT260\_ALERT\_2\_C Large Average Ueq of Residue Including C1S 0.162 Check  
PLAT340\_ALERT\_3\_C Low Bond Precision on C-C Bonds ..... 0.00939 Ang.  
PLAT767\_ALERT\_4\_C INS Embedded LIST 6 Instruction Should be LIST 4 Please Check  
PLAT790\_ALERT\_4\_C Centre of Gravity not Within Unit Cell: Resd. # 1 Note  
C19 H30 O3 S  
PLAT906\_ALERT\_3\_C Large K Value in the Analysis of Variance ..... 24.630 Check  
PLAT906\_ALERT\_3\_C Large K Value in the Analysis of Variance ..... 4.378 Check  
PLAT906\_ALERT\_3\_C Large K Value in the Analysis of Variance ..... 2.104 Check  
PLAT911\_ALERT\_3\_C Missing FCF Refl Between Thmin & STh/L= 0.600 25 Report  
1 2 0, 1 3 0, 2 3 0, 1 7 0, -1 0 1, -1 2 1,  
0 3 1, -1 4 1, 0 4 1, -2 0 2, 0 0 2, -1 1 2,  
0 1 2, -1 3 2, 0 3 2, -1 0 3, -1 2 3, 0 2 3,  
-1 3 3, 0 0 4, -1 1 4, 7 19 6, 9 1 10, -7 11 13,  
-3 2 15,  
PLAT913\_ALERT\_3\_C Missing # of Very Strong Reflections in FCF .... 8 Note  
0 2 0, 1 2 0, 1 3 0, 2 3 0, -2 0 2, 0 1 2,  
0 2 3, 0 0 4,  
PLAT918\_ALERT\_3\_C Reflection(s) with I(obs) much Smaller I(calc) . 1 Check  
PLAT934\_ALERT\_3\_C Number of (Iobs-Icalc)/Sigma(W) > 10 Outliers .. 1 Check  
-1 4 4,

---

### Alert level G

PLAT002\_ALERT\_2\_G Number of Distance or Angle Restraints on AtSite 20 Note  
PLAT003\_ALERT\_2\_G Number of Uiso or U(i,j) Restrained non-H-Atoms 19 Report  
PLAT007\_ALERT\_5\_G Number of Unrefined Donor-H Atoms ..... 4 Report  
H5 H6 H2 H3  
PLAT063\_ALERT\_4\_G Crystal Size Possibly too Large for Beam Size .. 0.70 mm

|                   |                                                    |                 |        |        |
|-------------------|----------------------------------------------------|-----------------|--------|--------|
| PLAT083_ALERT_2_G | SHELXL Second Parameter in WGHT                    | Unusually Large | 10.00  | Why ?  |
| PLAT171_ALERT_4_G | The CIF-Embedded .res File Contains EADP Records   |                 | 2      | Report |
| PLAT172_ALERT_4_G | The CIF-Embedded .res File Contains DFIX Records   |                 | 6      | Report |
| PLAT177_ALERT_4_G | The CIF-Embedded .res File Contains DELU Records   |                 | 2      | Report |
| PLAT186_ALERT_4_G | The CIF-Embedded .res File Contains ISOR Records   |                 | 7      | Report |
| PLAT192_ALERT_3_G | A Non-default DELU Restraint Value for First Par   |                 | 0.0010 | Report |
| PLAT192_ALERT_3_G | A Non-default DELU Restraint Value for SecondPar   |                 | 0.0020 | Report |
| PLAT192_ALERT_3_G | A Non-default DELU Restraint Value for SecondPar   |                 | 0.0200 | Report |
| PLAT199_ALERT_1_G | Reported _cell_measurement_temperature .....       | (K)             | 293    | Check  |
| PLAT200_ALERT_1_G | Reported _diffraction_ambient_temperature .....    | (K)             | 293    | Check  |
| PLAT300_ALERT_4_G | Atom Site Occupancy of C1S                         | Constrained at  | 0.25   | Check  |
| PLAT300_ALERT_4_G | Atom Site Occupancy of C2S                         | Constrained at  | 0.25   | Check  |
| PLAT300_ALERT_4_G | Atom Site Occupancy of C3S                         | Constrained at  | 0.25   | Check  |
| PLAT300_ALERT_4_G | Atom Site Occupancy of C4S                         | Constrained at  | 0.25   | Check  |
| PLAT300_ALERT_4_G | Atom Site Occupancy of C5S                         | Constrained at  | 0.25   | Check  |
| PLAT300_ALERT_4_G | Atom Site Occupancy of C6S                         | Constrained at  | 0.25   | Check  |
| PLAT300_ALERT_4_G | Atom Site Occupancy of H1SA                        | Constrained at  | 0.25   | Check  |
| PLAT300_ALERT_4_G | Atom Site Occupancy of H1SB                        | Constrained at  | 0.25   | Check  |
| PLAT300_ALERT_4_G | Atom Site Occupancy of H1SC                        | Constrained at  | 0.25   | Check  |
| PLAT300_ALERT_4_G | Atom Site Occupancy of H2SA                        | Constrained at  | 0.25   | Check  |
| PLAT300_ALERT_4_G | Atom Site Occupancy of H2SB                        | Constrained at  | 0.25   | Check  |
| PLAT300_ALERT_4_G | Atom Site Occupancy of H3SA                        | Constrained at  | 0.25   | Check  |
| PLAT300_ALERT_4_G | Atom Site Occupancy of H3SB                        | Constrained at  | 0.25   | Check  |
| PLAT300_ALERT_4_G | Atom Site Occupancy of H4SA                        | Constrained at  | 0.25   | Check  |
| PLAT300_ALERT_4_G | Atom Site Occupancy of H4SB                        | Constrained at  | 0.25   | Check  |
| PLAT300_ALERT_4_G | Atom Site Occupancy of H5SA                        | Constrained at  | 0.25   | Check  |
| PLAT300_ALERT_4_G | Atom Site Occupancy of H5SB                        | Constrained at  | 0.25   | Check  |
| PLAT300_ALERT_4_G | Atom Site Occupancy of H6SA                        | Constrained at  | 0.25   | Check  |
| PLAT300_ALERT_4_G | Atom Site Occupancy of H6SB                        | Constrained at  | 0.25   | Check  |
| PLAT300_ALERT_4_G | Atom Site Occupancy of H6SC                        | Constrained at  | 0.25   | Check  |
| PLAT301_ALERT_3_G | Main Residue Disorder .....                        | (Resd 1)        | 17%    | Note   |
| PLAT302_ALERT_4_G | Anion/Solvent/Minor-Residue Disorder (Resd 3)      |                 | 100%   | Note   |
| PLAT411_ALERT_2_G | Short Inter H...H Contact H18B ..H37C              |                 | 1.71   | Ang.   |
|                   | 1/2+x, 3/2-y, -1/2+z =                             |                 | 4_675  | Check  |
| PLAT412_ALERT_2_G | Short Intra XH3 .. XHn H31A ..H38C                 |                 | 1.87   | Ang.   |
|                   | x, y, z =                                          |                 | 1_555  | Check  |
| PLAT720_ALERT_4_G | Number of Unusual/Non-Standard Labels .....        |                 | 14     | Note   |
|                   | H1SA H1SB H1SC H2SA H2SB H3SA H3SB H4SA            |                 |        |        |
|                   | H4SB H5SA H5SB H6SA H6SB H6SC                      |                 |        |        |
| PLAT721_ALERT_1_G | Bond Calc 0.96000, Rep 0.97000 Dev...              |                 | 0.01   | Ang.   |
|                   | C37A -H37D 1_555 1_555 .....                       | #               | 117    | Check  |
| PLAT721_ALERT_1_G | Bond Calc 0.96000, Rep 0.97000 Dev...              |                 | 0.01   | Ang.   |
|                   | C5S -H5SA 1_555 1_555 .....                        | #               | 134    | Check  |
| PLAT721_ALERT_1_G | Bond Calc 0.97000, Rep 0.96000 Dev...              |                 | 0.01   | Ang.   |
|                   | C6S -H6SC 1_555 1_555 .....                        | #               | 139    | Check  |
| PLAT790_ALERT_4_G | Centre of Gravity not Within Unit Cell: Resd. #    |                 | 2      | Note   |
|                   | C19 H30 O3 S                                       |                 |        |        |
| PLAT790_ALERT_4_G | Centre of Gravity not Within Unit Cell: Resd. #    |                 | 3      | Note   |
|                   | C6 H14                                             |                 |        |        |
| PLAT860_ALERT_3_G | Number of Least-Squares Restraints .....           |                 | 139    | Note   |
| PLAT883_ALERT_1_G | Absent Datum for _atom_sites_solution_primary ..   |                 | Please | Do !   |
| PLAT910_ALERT_3_G | Missing FCF Reflection(s) Below Theta (Min) [Deg]= |                 | 2.11   | Note   |
|                   | 0 2 0, 0 1 1, 0 2 1,                               |                 |        |        |
| PLAT912_ALERT_4_G | Missing # of FCF Reflections Above STh/L= 0.600    |                 | 1      | Note   |
| PLAT933_ALERT_2_G | Number of HKL-OMIT Records in Embedded .res File   |                 | 16     | Note   |
|                   | -1 0 3, -1 1 2, -1 1 4, -1 2 1, -1 2 3, -1 3 2,    |                 |        |        |
|                   | -1 3 3, -1 4 1, 0 0 2, 0 2 1, 0 3 1, 0 3 2,        |                 |        |        |

```

      0 4 1, 1 2 0, 1 7 0, 2 3 0,
PLAT941_ALERT_3_G Average HKL Measurement Multiplicity ..... 4.8 Low
PLAT969_ALERT_5_G The 'Henn et al.' R-Factor-gap value ..... 5.010 Note
      Predicted wR2: Based on SigI**2 5.92 or SHELX Weight 25.77
PLAT978_ALERT_2_G Number C-C Bonds with Positive Residual Density. 1 Info

```

---

```

0 ALERT level A = Most likely a serious problem - resolve or explain
1 ALERT level B = A potentially serious problem, consider carefully
28 ALERT level C = Check. Ensure it is not caused by an omission or oversight
52 ALERT level G = General information/check it is not something unexpected

7 ALERT type 1 CIF construction/syntax error, inconsistent or missing data
21 ALERT type 2 Indicator that the structure model may be wrong or deficient
16 ALERT type 3 Indicator that the structure quality may be low
35 ALERT type 4 Improvement, methodology, query or suggestion
2 ALERT type 5 Informative message, check

```

---

It is advisable to attempt to resolve as many as possible of the alerts in all categories. Often the minor alerts point to easily fixed oversights, errors and omissions in your CIF or refinement strategy, so attention to these fine details can be worthwhile. In order to resolve some of the more serious problems it may be necessary to carry out additional measurements or structure refinements. However, the purpose of your study may justify the reported deviations and the more serious of these should normally be commented upon in the discussion or experimental section of a paper or in the "special\_details" fields of the CIF. checkCIF was carefully designed to identify outliers and unusual parameters, but every test has its limitations and alerts that are not important in a particular case may appear. Conversely, the absence of alerts does not guarantee there are no aspects of the results needing attention. It is up to the individual to critically assess their own results and, if necessary, seek expert advice.

### Publication of your CIF in IUCr journals

A basic structural check has been run on your CIF. These basic checks will be run on all CIFs submitted for publication in IUCr journals (*Acta Crystallographica*, *Journal of Applied Crystallography*, *Journal of Synchrotron Radiation*); however, if you intend to submit to *Acta Crystallographica Section C* or *E* or *IUCrData*, you should make sure that full publication checks are run on the final version of your CIF prior to submission.

### Publication of your CIF in other journals

Please refer to the *Notes for Authors* of the relevant journal for any special instructions relating to CIF submission.

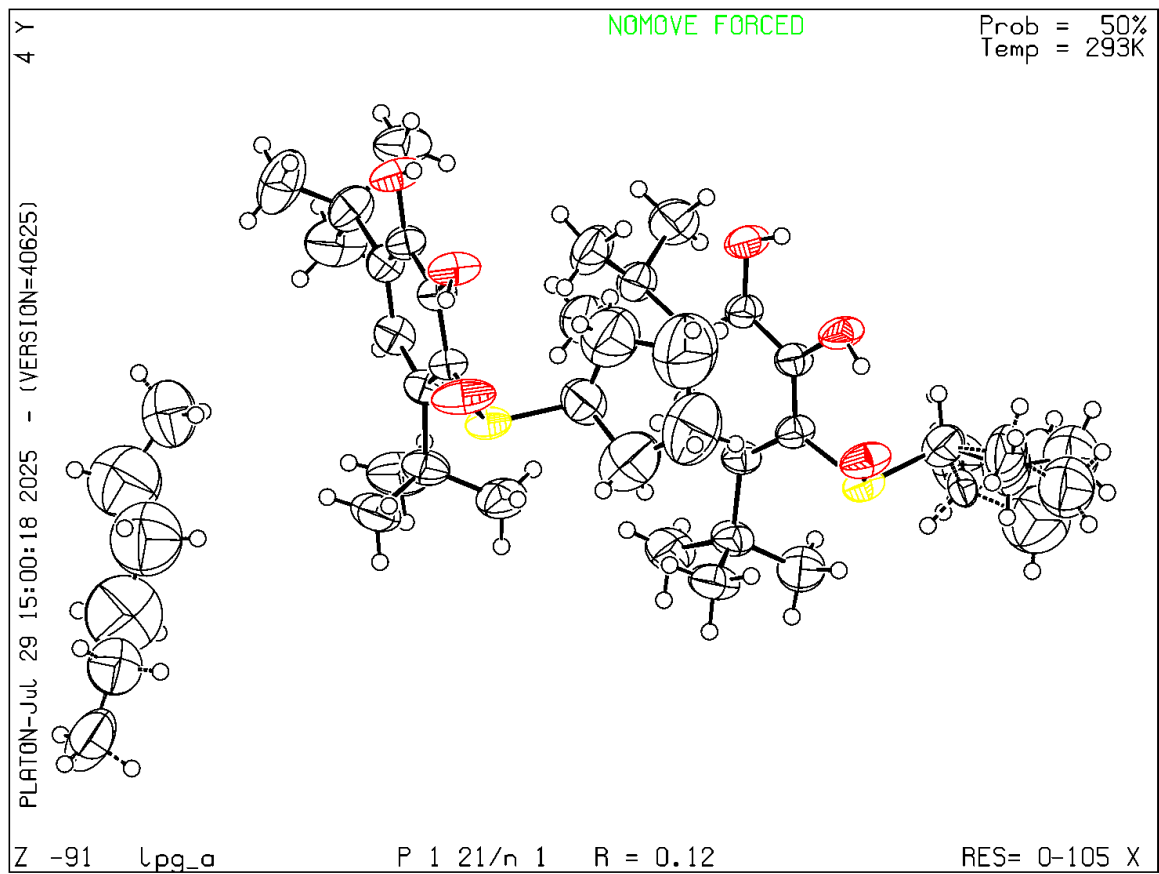

Supplement: Additional file 2 [file 4a_checkCIF.pdf › 4a_checkCIF.pdf]
