# Supplementary material for: Unsymmetrical sulfoxides with sterically hindered catechol fragment: synthesis, structure, electrochemical properties, and antiradical activity
Source: publisher site journal article supplement (doi:10.3762/bjoc.22.65), 2026-06-01
Supplement: Additional file 1 [file 1860-5397-22-65-S1.pdf]

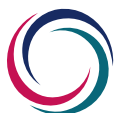

## Supporting Information

for

### **Unsymmetrical sulfoxides with sterically hindered catechol fragment: synthesis, structure, electrochemical properties, and antiradical activity**

Daria A. Burmistrova, Vasiliy A. Fokin, Oleg P. Demidov, Mikhail A. Kiskin, Maxim V. Arsenyev, Andrey I. Poddel'sky, Nadezhda T. Berberova and Ivan V. Smolyaninov

*Beilstein J. Org. Chem.* **2026**, *22*, 828–837. [doi:10.3762/bjoc.22.65](https://doi.org/10.3762/bjoc.22.65)

## **Experimental procedures and characterization data**

## Content

|                                                                                                                                                                       |     |
|-----------------------------------------------------------------------------------------------------------------------------------------------------------------------|-----|
| S1. Experimental procedures                                                                                                                                           | S4  |
| S1.1. General                                                                                                                                                         | S4  |
| S1.2. Instrumentation                                                                                                                                                 | S4  |
| S1.3. Synthesis and characterization                                                                                                                                  | S5  |
| S1.4. X-ray structures                                                                                                                                                | S13 |
| <b>Table S1.</b> Experimental details and crystallographic data for compounds <b>1a</b> , <b>4a–7a</b>                                                                | S14 |
| <b>Table S2:</b> Selected bond lengths (Å) and bond angles (°) of <b>1a</b> , <b>4a–7a</b>                                                                            | S16 |
| <b>Table S2.</b> C–H...A interactions in crystals of <b>1a</b> , <b>4a–7a</b>                                                                                         | S17 |
| <b>Table S3.</b> C–X... $\pi$ interactions in <b>1a</b> , <b>4a–7a</b>                                                                                                | S20 |
| S1.5. Antioxidant activity assay                                                                                                                                      | S20 |
| S1.5.1. DPPH radical scavenging activity assay                                                                                                                        | S20 |
| S1.5.2. ABTS assay                                                                                                                                                    | S20 |
| S2. NMR-spectra                                                                                                                                                       | S21 |
| <b>Figure S1.</b> The $^1\text{H}$ NMR spectrum of 4,6-di- <i>tert</i> -butyl-3-(isopropylthio)benzene-1,2-diol ( <b>1</b> ) in $\text{CDCl}_3$                       | S21 |
| <b>Figure S2.</b> The $^{13}\text{C}\{^1\text{H}\}$ NMR spectrum of 4,6-di- <i>tert</i> -butyl-3-(isopropylthio)benzene-1,2-diol in $\text{CDCl}_3$ ( <b>1</b> )      | S21 |
| <b>Figure S3.</b> The $^1\text{H}$ NMR spectrum of 4,6-di- <i>tert</i> -butyl-3-(isopropylsulfinyl)benzene-1,2-diol ( <b>1a</b> ) in $\text{CDCl}_3$                  | S22 |
| <b>Figure S4.</b> The $^{13}\text{C}\{^1\text{H}\}$ NMR spectrum of 4,6-di- <i>tert</i> -butyl-3-(isopropylsulfinyl)benzene-1,2-diol ( <b>1a</b> ) in $\text{CDCl}_3$ | S22 |
| <b>Figure S5.</b> The $^1\text{H}$ NMR spectrum of 4,6-di- <i>tert</i> -butyl-3-( <i>tert</i> -butylthio)benzene-1,2-diol ( <b>2</b> ) in $\text{CDCl}_3$             | S23 |

|                                                                                                                                                                                          |     |
|------------------------------------------------------------------------------------------------------------------------------------------------------------------------------------------|-----|
| <b>Figure S6.</b> The $^{13}\text{C}\{^1\text{H}\}$ NMR spectrum of 4,6-di- <i>tert</i> -butyl-3-( <i>tert</i> -butylthio)benzene-1,2-diol ( <b>2</b> ) in $\text{CDCl}_3$               | S23 |
| <b>Figure S7.</b> The $^1\text{H}$ NMR spectrum of 4,6-di- <i>tert</i> -butyl-3-( <i>tert</i> -butylsulfinyl)benzene-1,2-diol ( <b>2a</b> ) in $\text{CDCl}_3$                           | S24 |
| <b>Figure S8.</b> The $^{13}\text{C}\{^1\text{H}\}$ NMR spectrum of 4,6-di- <i>tert</i> -butyl-3-( <i>tert</i> -butylsulfinyl)benzene-1,2-diol ( <b>2a</b> ) in $\text{CDCl}_3$          | S24 |
| <b>Figure S9.</b> The $^1\text{H}$ NMR spectrum of 4,6-di- <i>tert</i> -butyl-3-(octylsulfinyl)benzene-1,2-diol ( <b>3a</b> ) in $\text{CDCl}_3$                                         | S25 |
| <b>Figure S10.</b> The $^{13}\text{C}\{^1\text{H}\}$ NMR spectrum of 4,6-di- <i>tert</i> -butyl-3-(octylsulfinyl)benzene-1,2-diol ( <b>3a</b> ) in $\text{CDCl}_3$                       | S25 |
| <b>Figure S11.</b> The $^1\text{H}$ NMR spectrum of 4,6-di- <i>tert</i> -butyl-3-(cyclopentylsulfinyl)benzene-1,2-diol ( <b>4a</b> ) in $\text{CDCl}_3$                                  | S26 |
| <b>Figure S12.</b> The $^{13}\text{C}\{^1\text{H}\}$ NMR spectrum of 4,6-di- <i>tert</i> -butyl-3-(cyclopentylsulfinyl)-benzene-1,2-diol ( <b>4a</b> ) in $\text{CDCl}_3$                | S26 |
| <b>Figure S13.</b> The $^1\text{H}$ NMR spectrum of 3-(((3s,5s,7s)-adamantan-1-yl)sulfinyl)-4,6-di- <i>tert</i> -butylbenzene-1,2-diol ( <b>5a</b> ) in $\text{CDCl}_3$                  | S27 |
| <b>Figure S14.</b> The $^{13}\text{C}\{^1\text{H}\}$ NMR spectrum of 3-(((3s,5s,7s)-adamantan-1-yl)sulfinyl)-4,6-di- <i>tert</i> -butylbenzene-1,2-diol ( <b>5a</b> ) in $\text{CDCl}_3$ | S27 |
| <b>Figure S15.</b> The $^1\text{H}$ NMR spectrum of 3-(benzylsulfinyl)-4,6-di- <i>tert</i> -butylbenzene-1,2-diol in $\text{CDCl}_3$ ( <b>6a</b> )                                       | S28 |
| <b>Figure S16.</b> The $^{13}\text{C}\{^1\text{H}\}$ NMR spectrum of 3-(benzylsulfinyl)-4,6-di- <i>tert</i> -butylbenzene-1,2-diol in $\text{CDCl}_3$ ( <b>6a</b> )                      | S28 |
| <b>Figure S17.</b> The $^1\text{H}$ NMR spectrum of 4,6-di- <i>tert</i> -butyl-3-(naphthalen-1-ylthio)benzene-1,2-diol in $\text{CDCl}_3$ ( <b>7</b> )                                   | S29 |
| <b>Figure S18.</b> The $^{13}\text{C}\{^1\text{H}\}$ NMR spectrum of 4,6-di- <i>tert</i> -butyl-3-(naphthalen-1-ylthio)benzene-1,2-diol in $\text{DMSO}-d_6$ ( <b>7</b> )                | S29 |
| <b>Figure S19.</b> The $^1\text{H}$ NMR spectrum of 4,6-di- <i>tert</i> -butyl-3-(naphthalen-1-ylsulfinyl)benzene-1,2-diol in $\text{CDCl}_3$ ( <b>7a</b> )                              | S30 |
| <b>Figure S20.</b> The $^{13}\text{C}\{^1\text{H}\}$ NMR spectrum of 4,6-di- <i>tert</i> -butyl-3-(naphthalen-1-ylsulfinyl)benzene-1,2-diol ( <b>7a</b> )                                | S30 |
| S3. HRMS-Spectra                                                                                                                                                                         | S31 |
| <b>Figure S21.</b> The HRMS spectrum of <b>1a</b>                                                                                                                                        | S31 |
| <b>Figure S22.</b> The HRMS spectrum of <b>2a</b>                                                                                                                                        | S31 |
| <b>Figure S23.</b> The HRMS spectrum of <b>3a</b>                                                                                                                                        | S32 |
| <b>Figure S24.</b> The HRMS spectrum of <b>6a</b>                                                                                                                                        | S32 |

|                                                                                |     |
|--------------------------------------------------------------------------------|-----|
| <b>Figure S25.</b> The HRMS spectrum of <b>7</b>                               | S33 |
| <b>Figure S26.</b> The HRMS spectrum of <b>7a</b>                              | S33 |
| S4. Electrochemical data                                                       | S34 |
| <b>Figure S27.</b> The CV curve of <b>2</b>                                    | S34 |
| <b>Figure S28.</b> The CV curve of <b>2a</b>                                   | S34 |
| <b>Figure S29.</b> The CV curve of <b>3a</b>                                   | S35 |
| <b>Figure S30.</b> The CV curve of <b>4a</b>                                   | S35 |
| <b>Figure S31.</b> The CV curve of <b>6a</b>                                   | S36 |
| <b>Figure S32.</b> The CV curve of <b>7</b> and <b>7a</b>                      | S36 |
| S5. UV–vis spectroscopy                                                        | S37 |
| <b>Figure S33.</b> UV–vis spectra of the products of electrolysis of <b>5a</b> | S37 |
| S6. References                                                                 | S37 |

## S1. Experimental procedures

### S1.1. General

All starting reagents were commercially available: 3,5-di-*tert*-butyl-*o*-benzoquinone (99%, Alfa Aesar), 2-propanethiol (98%, Aldrich), 2-methyl-2-propanethiol (99%, Aldrich), 1-naphthalenethiol (99%, Aldrich), tetra-*n*-butylammonium perchlorate (>99%, Alfa Aesar), hydrogen peroxide (30%, Aldrich), acetic acid (99.5%, AppliChem), 2,2'-azino-bis(3-ethylbenzothiazoline-6-sulfonic acid) ( $\geq 98\%$ , TCI), potassium persulfate (99%, Sigma Aldrich), 2,2-diphenyl-1-picrylhydrazyl (Aldrich). The catechol thioethers **3–6** were synthesized by the known methods [1,2]: 4,6-di-*tert*-butyl-3-(octylthio)benzene-1,2-diol (**3**) [1], 4,6-di-*tert*-butyl-3-(cyclopentylthio)benzene-1,2-diol (**4**) [1], 3-((3s,5s,7s)-adamantan-1-ylthio)-4,6-di-*tert*-butylbenzene-1,2-diol (**5**) [2], 4,6-di-*tert*-butyl-3-(benzylthio)benzene-1,2-diol (**6**) [1]. Standard procedures have been used to purify solvents [3].

### S1.2. Instrumentation

An FSM-1201 FT-IR spectrometer was used to record IR spectra in KBr pellets. The  $^1\text{H}$  and  $^{13}\text{C}\{^1\text{H}\}$  NMR spectra were measured in  $\text{CDCl}_3$  or DMSO on Bruker Avance HD 400 spectrometer with a frequency of 400 MHz for  $^1\text{H}$  and 100 MHz for  $^{13}\text{C}\{^1\text{H}\}$  NMR spectra or Bruker Avance DPX-300 with a frequency of 300 MHz for  $^1\text{H}$  and 75 MHz for  $^{13}\text{C}\{^1\text{H}\}$  NMR spectra. The chemical shift values are given in ppm with reference to the solvent, and the coupling constants ( $J$ ) are given in Hz. The Euro EA 3000 (C,H,N) elemental analyzer was used to determine the elemental composition of the synthesized substances. High-resolution mass spectra (HRMS) were recorded on a mass spectrometer Bruker UHR-TOF Maxis<sup>TM</sup> (ESI). The UV–vis spectra were recorded with a SF-104 spectrophotometer (Akvilon, Podol'sk, Russia) in a range of 300–1000 nm. To determine the electrochemical potentials of catechol thioethers **1–7** and sulfoxides **1a–7a**, a technique of cyclic voltammetry (CV) was used. The measurements occurred in

a three-electrode cell on a VersaSTAT3 (Princeton Applied Research) potentiostat in CH<sub>3</sub>CN under argon. A stationary glassy carbon (GC) electrode with a diameter of 2 mm was the working electrode and a platinum plate (S = 18 mm<sup>2</sup>) served as the auxiliary electrode. The potentials of the complexes were measured versus the reference electrode (Ag/AgCl/KCl) with a waterproof membrane. The number of electrons transferred during the electrode process was estimated relative to ferrocene as the standard. The concentration of compounds was 3 mmol in CH<sub>3</sub>CN containing 0.1 M n-Bu<sub>4</sub>NClO<sub>4</sub> as supporting electrolyte, with scan rates of 0.2 V·s<sup>-1</sup>.

Microelectrolysis of catechol sulfoxides **5a–7a** was performed on a VersaSTAT3 potentiostat at stationary platinum electrodes (S = 18 mm<sup>2</sup>) in an undivided three-electrode cell (2 mL) under anaerobic conditions. Catechol was added to an electrochemical cell containing a solution of the supporting electrolyte (0.1 M Bu<sub>4</sub>NClO<sub>4</sub>) in acetonitrile. Electrolysis was performed in the potentiostatic mode at a potential of 1.25–1.35 V.

### **S1.3. Synthesis and characterization**

New catechol thioethers **1**, **2**, and **7** were obtained from 3,5-di-*tert*-butyl-*o*-benzoquinone (1.0 g, 4.5 mmol) and corresponding thiol (5.4 mmol) in ethanol (10 mL) under an inert atmosphere (argon). The synthesis was carried out for 4–5 hours until the reaction mixture became completely colorless. The solvent was evaporated under reduced pressure. The formed precipitate was recrystallized from acetonitrile. Compounds **3–6** were previously prepared [1,2]. Catechol sulfoxides **1a–7a** were synthesized by oxidation of the corresponding thioether **1–7** (1.6 mmol) in the presence of 30% H<sub>2</sub>O<sub>2</sub> (1.0 mmol) and AcOH (2:1 v/v) in acetone (3 mL) with stirring for 4–5 h at 50 °C. After the reaction, 10 mL of water was added to the solution; the resulting precipitate was filtered off, dried in a vacuum, and recrystallized from acetonitrile, hexane (for **4a**) or chloroform (for **7a**).

#### 4,6-Di-*tert*-butyl-3-(isopropylthio)benzene-1,2-diol (1)

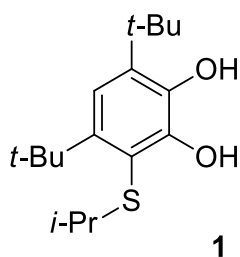

Yield 0.840 g (63%). White crystals with m.p. 88–90°C.

IR (KBr,  $\nu/\text{cm}^{-1}$ ): 3480, 3390, 2997, 2959, 2907, 2868, 1700, 1685, 1654, 1606, 1559, 1542, 1522, 1520, 1506, 1483, 1458, 1446, 1397, 1364, 1349, 1293, 1263, 1236, 1201, 1179, 1155, 1044, 1025, 964, 865.

$^1\text{H}$  NMR (400 MHz,  $\text{CDCl}_3$ ,  $\delta$ , ppm): 1.27 (d,  $^3J(\text{H,H}) = 6.7$  Hz, 6H, iPr), 1.40 (s, 9H, tBu), 1.48 (s, 9H, tBu), 3.13 (hept,  $^3J(\text{H,H}) = 6.7$  Hz, 1H, CH), 5.55 (s, 1H, OH), 6.92 (s, 1H, arom.  $\text{C}_6\text{H}_1$ ), 7.28 (s, 1H, OH).

$^{13}\text{C}\{^1\text{H}\}$  NMR (100 MHz,  $\text{CDCl}_3$ ,  $\delta$ , ppm): 23.4, 29.4, 31.9, 35.0, 35.3, 37.1, 41.9, 114.7, 116.2, 136.1, 140.5, 143.8, 145.9.

HR-MS: Found  $m/z$ : 295.1744  $[\text{M}-\text{H}]^+$ .  $\text{C}_{17}\text{H}_{27}\text{O}_2\text{S}$ . Calcd.  $m/z$ : 295.1737.

#### 4,6-Di-*tert*-butyl-3-(isopropylsulfinyl)benzene-1,2-diol (1a)

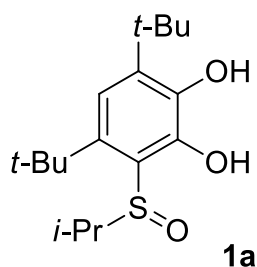

Yield 0.290 g (58%). White crystals with m.p. 140–142°C.

IR (KBr,  $\nu/\text{cm}^{-1}$ ): 3418, 3368, 2991, 2966, 2906, 2872, 1701, 1654, 1604, 1570, 1558, 1540, 1508, 1485, 1467, 1403, 1367, 1345, 1292, 1270, 1248, 1218, 1207, 1169, 1162, 1062, 1026, 977, 960, 946 (S=O), 865.

$^1\text{H}$  NMR (400 MHz,  $\text{CDCl}_3$ ,  $\delta$ , ppm): 1.25 (d,  $^3J(\text{H,H}) = 7.0$  Hz, 3H, iPr), 1.40 (br. s, 18H, 2 tBu), 1.50 (d,  $^3J(\text{H,H}) = 6.6$  Hz, 3H, iPr), 3.53-3.66 (m, 1H, CH), 6.08 (s, 1H, OH), 6.87 (s, 1H, arom.  $\text{C}_6\text{H}_1$ ), 11.47 (s, 1H, OH).

$^{13}\text{C}\{^1\text{H}\}$  NMR (100 MHz,  $\text{CDCl}_3$ ,  $\delta$ , ppm): 16.3, 19.0, 29.2, 33.3, 35.3, 36.7, 54.4, 116.0, 117.1, 137.9, 139.1, 143.1, 148.9.

HR-MS: Found  $m/z$ : 335.1656  $[\text{M}+\text{Na}]^+$ .  $\text{C}_{17}\text{H}_{28}\text{NaO}_3\text{S}$ . Calcd.  $m/z$ : 335.1651.

#### 4,6-Di-*tert*-butyl-3-(*tert*-butylthio)benzene-1,2-diol (**2**)

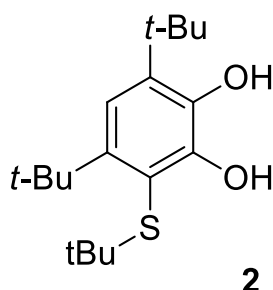

Yield 0.711 g (51%). White crystals with m.p. 94–96°C.

IR (KBr,  $\text{v}/\text{cm}^{-1}$ ): 3506, 3257, 3003, 2959, 2910, 2868, 1730, 1608, 1566, 1487, 1475, 1459, 1396, 1367, 1309, 1288, 1261, 1240, 1170, 1151, 1026, 962, 935, 866.

$^1\text{H}$  NMR (400 MHz,  $\text{CDCl}_3$ ,  $\delta$ , ppm): 1.36 (s, 9H, tBu), 1.42 (s, 9H, tBu), 1.48 (s, 9H, tBu), 5.55 (s, 1H, OH), 6.93 (s, 1H, arom.  $\text{C}_6\text{H}_1$ ), 7.11 (s, 1H, OH).

$^{13}\text{C}\{^1\text{H}\}$  NMR (100 MHz,  $\text{CDCl}_3$ ,  $\delta$ , ppm): 29.5, 32.5, 35.2, 37.2, 49.9, 114.7, 116.3, 136.1, 140.4, 144.2, 146.1.

HR-MS: Found  $m/z$ : 309.1895  $[\text{M}-\text{H}]^+$ .  $\text{C}_{18}\text{H}_{29}\text{O}_2\text{S}$ . Calcd.  $m/z$ : 309.1894.

#### 4,6-Di-*tert*-butyl-3-(*tert*-butylsulfinyl)benzene-1,2-diol (2a)

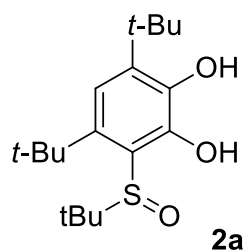

Yield 0.313 g (60%). White crystals with m.p. 139–141°C.

IR (KBr,  $\nu/\text{cm}^{-1}$ ): 3465, 2990, 2965, 2912, 2874, 1733, 1600, 1573, 1545, 1484, 1460, 1413, 1394, 1369, 1355, 1288, 1266, 1235, 1160, 1093, 1028, 970, 947 (S=O), 869.

$^1\text{H}$  NMR (400 MHz,  $\text{CDCl}_3$ ,  $\delta$ , ppm): 1.38 (s, 9H, tBu), 1.39 (s, 9H, tBu), 1.42 (s, 9H, tBu), 6.04 (s, 1H, OH), 6.88 (s, 1H, arom.  $\text{C}_6\text{H}_1$ ), 11.74 (s, 1H, OH).

$^{13}\text{C}\{^1\text{H}\}$  NMR (100 MHz,  $\text{CDCl}_3$ ,  $\delta$ , ppm): 26.4, 29.3, 34.1, 35.3, 37.2, 62.2, 114.8, 116.5, 138.0, 140.1, 142.7, 149.6.

HR-MS: Found  $m/z$ : 349.1812  $[\text{M}+\text{Na}]^+$ .  $\text{C}_{18}\text{H}_{30}\text{NaO}_3\text{S}$ . Calcd.  $m/z$ : 349.1808.

#### 4,6-Di-*tert*-butyl-3-(octylsulfinyl)benzene-1,2-diol (3a)

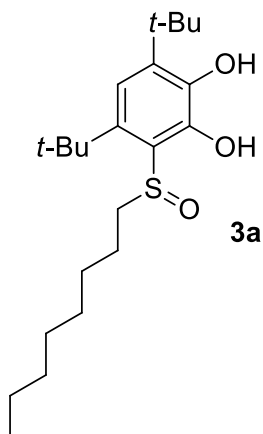

Yield 0.300 g (49%). White powder with m.p. 99–101°C.

IR (KBr,  $\nu/\text{cm}^{-1}$ ): 3260, 2959, 2926, 2858, 1653, 1601, 1567, 1540, 1508, 1482, 1470, 1458, 1400, 1364, 1341, 1291, 1268, 1221, 1205, 1168, 1025, 966, 867.

$^1\text{H}$  NMR (400 MHz,  $\text{CDCl}_3$ ,  $\delta$ , ppm): 0.88 (t,  $J = 6.1$  Hz, 3H,  $\text{CH}_3$ ), 1.22-1.35 (m, 8H, 4  $\text{CH}_2$ ), 1.38 (s, 9 H, tBu), 1.39 (s, 9 H, tBu), 1.43-1.54 (m, 2H,  $\text{CH}_2$ ), 1.88-1.94 (m, 2H,  $\text{CH}_2$ ), 2.84-2.94 (m, 1H,  $\text{CH}_2\text{S}$ ), 3.54-3.62 (m, 1H,  $\text{CH}_2\text{S}$ ), 6.10 (s, 1H, OH), 6.84 (s, 1H, arom.  $\text{C}_6\text{H}_1$ ), 11.33 (s, 1H, OH).

$^{13}\text{C}\{^1\text{H}\}$  NMR (100 MHz,  $\text{CDCl}_3$ ,  $\delta$ , ppm): 14.2, 22.7, 24.3, 28.6, 29.2, 29.2, 29.3, 31.9, 32.6, 35.3, 36.3, 52.4, 115.5, 119.6, 137.8, 137.9, 143.4, 148.5.

HR-MS: Found  $m/z$ : 405.2440  $[\text{M}+\text{Na}]^+$ .  $\text{C}_{22}\text{H}_{38}\text{NaO}_3\text{S}$ . Calcd.  $m/z$ : 405.2434.

#### 4,6-Di-*tert*-butyl-3-(cyclopentylsulfinyl)benzene-1,2-diol (4a)

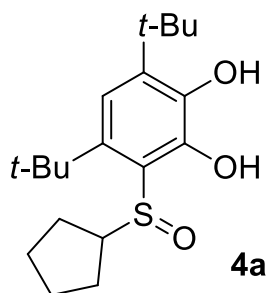

Yield 0.297 g (55%). White powder with m.p. 124–126°C.

IR (KBr,  $\text{v}/\text{cm}^{-1}$ ): 3259, 2958, 2914, 2870, 1653, 1602, 1570, 1561, 1485, 1472, 1456, 1403, 1367, 1349, 1291, 1267, 1227, 1170, 1025, 973, 945 (S=O), 864.

$^1\text{H}$  NMR (400 MHz,  $\text{CDCl}_3$ ,  $\delta$ , ppm): 1.39 (s, 9 H, tBu), 1.40 (s, 9 H, tBu), 1.60-1.94 (m, 4H,  $\text{CH}_2$ ), 2.00-2.09 (m, 2H,  $\text{CH}_2$ ), 2.25-2.34 (m, 2H,  $\text{CH}_2$ ), 3.80 (p,  $J = 7.7$  Hz, 1H, CH, cyclopentyl), 6.09 (s, 1H, OH), 6.85 (s, 1H, arom.  $\text{C}_6\text{H}_1$ ), 11.37 (br.s., 1H, OH).

$^{13}\text{C}\{^1\text{H}\}$  NMR (100 MHz,  $\text{CDCl}_3$ ,  $\delta$ , ppm): 25.2, 25.4, 27.1, 29.0, 29.2, 33.2, 35.3, 36.6, 63.5, 115.9, 118.5, 137.8, 138.5, 143.1, 148.8.

Calcd. for  $\text{C}_{19}\text{H}_{30}\text{O}_3\text{S}$  (%): C, 67.42; H, 8.93 Found (%): C, 67.21; H, 9.18.

### 3-(((3s,5s,7s)-Adamantan-1-yl)sulfinyl)-4,6-di-*tert*-butylbenzene-1,2-diol (5a)

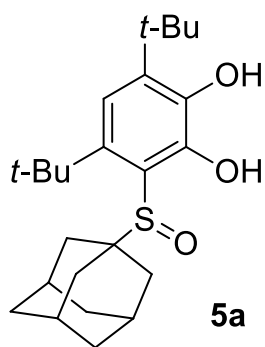

Yield 0.272 g (42%). White powder with m.p. 162–164°C.

IR (KBr,  $\nu/\text{cm}^{-1}$ ): 3509, 3276, 2997, 2962, 2906, 2853, 1602, 1566, 1484, 1472, 1451, 1401, 1366, 1345, 1298, 1269, 1247, 1223, 1170, 1104, 1036, 972, 962, 951 (S=O), 935, 865, 816, 788.

$^1\text{H}$  NMR (300 MHz,  $\text{CDCl}_3$ ,  $\delta$ , ppm): 1.40 (s, 9H, tBu), 1.41 (s, 9H, tBu), 1.65-1.71 (m, 6H, 3CH<sub>2</sub>), 1.90-2.08 (m, 6H, S-C(CH<sub>2</sub>)<sub>3</sub>), 2.12-2.20 (m, 3H, 3CH), 6.04 (s, 1H, OH), 6.88 (s, 1H, C<sub>6</sub>H<sub>1</sub> arom.), 11.85 (s, 1H, OH).

$^{13}\text{C}\{^1\text{H}\}$  NMR (75 MHz,  $\text{CDCl}_3$ ,  $\delta$ , ppm): 29.3, 29.9, 34.2, 35.3, 36.1, 37.2, 37.9, 64.4, 113.4, 116.6, 137.8, 140.3, 142.6, 145.0.

Calcd. for C<sub>24</sub>H<sub>36</sub>O<sub>3</sub>S (%): C, 71.24; H, 8.97. Found (%): C, 71.05; H, 9.45.

### 3-(Benzylsulfinyl)-4,6-di-*tert*-butylbenzene-1,2-diol (6a)

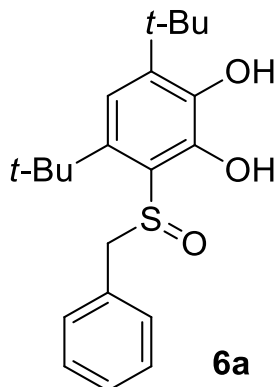

Yield 0.422 g (73%). White crystals with m.p. 151–152°C.

IR (KBr,  $\nu/\text{cm}^{-1}$ ): 3340, 3091, 3067, 2959, 2909, 2870, 1653, 1604, 1559, 1541, 1521, 1507, 1495, 1483, 1473, 1456, 1437, 1401, 1366, 1347, 1292, 1266, 1228, 1205, 1171, 1071, 1026, 975, 949 (S=O), 910, 878, 863, 787.

$^1\text{H}$  NMR (400 MHz,  $\text{CDCl}_3$ ,  $\delta$ , ppm): 1.41 (s., 9H, tBu), 1.43 (s., 9H, tBu), 4.27 (d,  $^2J(\text{H},\text{H}) = 13.1$  Hz, 1H,  $\text{CH}_2$ ), 4.66 (d,  $^2J(\text{H},\text{H}) = 13.1$  Hz, 1H,  $\text{CH}_2$ ), 6.17 (s., 1H, OH), 6.89 (s., 1H, arom.  $\text{C}_6\text{H}_1$ ), 7.32 – 7.45 (m., 5H, Ph), 11.38 (s., 1H, OH).

$^{13}\text{C}\{^1\text{H}\}$  NMR (100 MHz,  $\text{CDCl}_3$ ,  $\delta$ , ppm): 29.2, 32.7, 35.4, 36.4, 58.4, 115.7, 119.3, 128.9, 129.2, 130.4, 131.1, 138.2, 138.3, 143.4, 148.4.

HR-MS: Found  $m/z$ : 383.1652  $[\text{M}+\text{Na}]^+$ .  $\text{C}_{21}\text{H}_{28}\text{NaO}_3\text{S}$ . Calcd.  $m/z$ : 383.1651.

#### 4,6-Di-*tert*-butyl-3-(naphthalen-1-ylthio)benzene-1,2-diol (7)

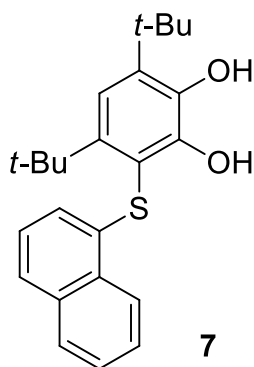

Yield 1.045 g (61%). White powder with m.p. 118–120°C.

IR (KBr,  $\nu/\text{cm}^{-1}$ ): 3537, 3403, 3081, 3055, 2998, 2989, 2961, 2909, 2867, 1733, 1700, 1685, 1653, 1591, 1564, 1446, 1365, 1350, 1289, 1259, 1236, 1171, 1143, 1060, 1024, 965, 870.

$^1\text{H}$  NMR (400 MHz,  $\text{CDCl}_3$ ,  $\delta$ , ppm): 1.44 (s., 9H, tBu), 1.48 (s., 9H, tBu), 5.62 (s., 1H, OH), 6.60 (d.,  $J = 7.4$  Hz, 1H, arom.  $\text{C}_{10}\text{H}_7$ ), 6.75 (s., 1H, arom.  $\text{C}_6\text{H}_1$ ), 7.10 (s, 1H, OH), 7.26 (d., 1H, arom.  $\text{C}_{10}\text{H}_7$ ), 7.56 (t.,  $J = 7.4$  Hz, 1H, arom.  $\text{C}_{10}\text{H}_7$ ), 7.62 (t.,  $J = 7.7$  Hz, 2H, arom.  $\text{C}_{10}\text{H}_7$ ), 7.88 (d.,  $J = 8.1$  Hz, 1H, arom.  $\text{C}_{10}\text{H}_7$ ), 8.37 (d.,  $J = 8.3$  Hz, 1H, arom.  $\text{C}_{10}\text{H}_7$ ).

$^{13}\text{C}\{^1\text{H}\}$  NMR (100 MHz, DMSO- $d_6$ ,  $\delta$ , ppm): 29.3, 31.1, 34.9, 36.5, 111.9, 115.8, 121.0, 123.6, 124.5, 126.0, 126.1, 126.3, 128.5, 129.8, 133.3, 135.3, 137.0, 142.8, 142.9, 148.5.

HR-MS: Found  $m/z$ : 403.1710  $[\text{M}+\text{Na}]^+$ .  $\text{C}_{24}\text{H}_{28}\text{NaO}_2\text{S}$ . Calcd.  $m/z$ : 403.1702.

#### 4,6-Di-*tert*-butyl-3-(naphthalen-1-ylsulfinyl)benzene-1,2-diol (7a)

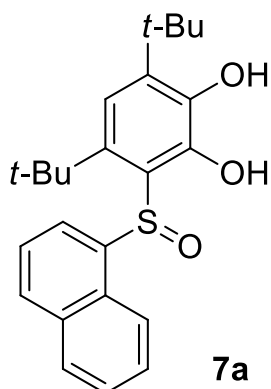

Yield 0.565 g (89%). White crystals with m.p. 216–218°C.

IR (KBr,  $\text{v}/\text{cm}^{-1}$ ): 3223, 3059, 2984, 2965, 2953, 2907, 2869, 1699, 1600, 1593, 1569, 1560, 1507, 1482, 1468, 1406, 1366, 1342, 1291, 1266, 1223, 1201, 1171, 1027, 972, 957, 947 (S=O), 864.

$^1\text{H}$  NMR (400 MHz,  $\text{CDCl}_3$ ,  $\delta$ , ppm): 1.13 (s., 9H, tBu), 1.31 (s., 9H, tBu), 6.04 (s., 1H, OH), 6.82 (s., 1H, arom.  $\text{C}_6\text{H}_1$ ), 7.10 (t., 2H, arom.  $\text{C}_{10}\text{H}_7$ ), 7.53 (dd., 2H, arom.  $\text{C}_{10}\text{H}_7$ ), 7.84 (t., 2H, arom.  $\text{C}_{10}\text{H}_7$ ), 8.56 (t., 1H, arom.  $\text{C}_{10}\text{H}_7$ ), 11.42 (s., 1H, OH).

$^{13}\text{C}\{^1\text{H}\}$  NMR (100 MHz,  $\text{CDCl}_3$ ,  $\delta$ , ppm): 29.3, 32.6, 35.5, 36.4, 114.5, 115.9, 123.7, 125.3, 126.2, 127.2, 128.2, 129.2, 131.0, 133.1, 134.5, 136.7, 138.8, 139.6, 143.9, 149.9.

HR-MS: Found  $m/z$ : 419.1658  $[\text{M}+\text{Na}]^+$ .  $\text{C}_{24}\text{H}_{28}\text{NaO}_3\text{S}$ . Calcd.  $m/z$ : 419.1651.

## S1.4. X-ray structures

Single crystal X-ray diffraction data were collected using an in a SuperNova, Dual, Cu at home/near, AtlasS2 diffractometer (CuK/α radiation,  $\lambda = 1.54186 \text{ \AA}$ ) for **1a** and **7a**, Bruker APEX II diffractometer (CCD detector, MoK/α radiation,  $\lambda = 0.71073 \text{ \AA}$ ) for **4a** and **6a**, a Bruker D8 Venture diffractometer (CCD detector, MoK/α radiation,  $\lambda = 0.71073 \text{ \AA}$ ) for **5a**. Semi-empirical empirical absorption corrections for all compounds were applied [4,5]. The structures of the compounds were solved by direct methods and refined in the full-matrix anisotropic approximation for all non-hydrogen atoms. The crystal structures **4a** and **7a** were solved taking into account the disordering at two positions of cyclopentyl and naphthyl fragments respectively. The hydrogen atoms of the carbon-containing ligands were positioned geometrically and refined using the riding model. The crystal structure was solved by using Olex2 packages and/or SHELXL-2014 [6–8]. The crystallographic parameters and the structure refinement statistics for **1a**, **4a–7a** are shown in **Table S1**. The structural data for the compounds have been deposited with the Cambridge Crystallographic Data Centre (CCDC 2534166 (**1a**), 2539526 (**4a**), 2539527 (**5a**), 2539528 (**6a**), 2534168 (**7a**)) and are available at [deposit@ccdc.cam.ac.uk](mailto:deposit@ccdc.cam.ac.uk) or [http://www.ccdc.cam.ac.uk/data\\_request/cif](http://www.ccdc.cam.ac.uk/data_request/cif).

**Table S1.** Experimental details and crystallographic data for compounds **1a**, **4a–7a**

| Compound/<br>Parameter                     | <b>1a</b>                                        | <b>4a</b>                                                         | <b>5a</b>                                                     | <b>6a</b>                                            | <b>7a</b>                                        |
|--------------------------------------------|--------------------------------------------------|-------------------------------------------------------------------|---------------------------------------------------------------|------------------------------------------------------|--------------------------------------------------|
| CCDC number                                | 2534166                                          | 2539526                                                           | 2539527                                                       | 2539528                                              | 2534168                                          |
| Empirical formula                          | C <sub>17</sub> H <sub>28</sub> O <sub>3</sub> S | C <sub>39.5</sub> H <sub>63.5</sub> O <sub>6</sub> S <sub>2</sub> | C <sub>48</sub> H <sub>72</sub> O <sub>6</sub> S <sub>2</sub> | C <sub>21</sub> H <sub>28</sub> O <sub>3</sub> S     | C <sub>24</sub> H <sub>28</sub> O <sub>3</sub> S |
| Formula weight                             | 312.45                                           | 698.52                                                            | 809.17                                                        | 360.49                                               | 396.52                                           |
| Temperature [K]                            | 100.15                                           | 293(2)                                                            | 100.00                                                        | 100.00                                               | 293(2)                                           |
| Crystal system                             | orthorhombic                                     | monoclinic                                                        | monoclinic                                                    | orthorhombic                                         | monoclinic                                       |
| Space group (number)                       | <i>Pbca</i> (61)                                 | <i>P2<sub>1</sub>/n</i> (14)                                      | <i>P2<sub>1</sub>/c</i> (14)                                  | <i>P2<sub>1</sub>2<sub>1</sub>2<sub>1</sub></i> (19) | <i>P2<sub>1</sub>/c</i> (14)                     |
| <i>a</i> [Å]                               | 11.10107(17)                                     | 10.419(8)                                                         | 10.5266(6)                                                    | 10.1078(9)                                           | 15.0697(6)                                       |
| <i>b</i> [Å]                               | 9.68288(17)                                      | 29.386(16)                                                        | 14.0422(8)                                                    | 12.8261(12)                                          | 8.5154(3)                                        |
| <i>c</i> [Å]                               | 32.3713(5)                                       | 15.691(10)                                                        | 29.9683(16)                                                   | 15.2212(15)                                          | 19.8597(7)                                       |
| $\beta$ [°]                                | 90                                               | 101.33(3)                                                         | 91.149(2)                                                     | 90                                                   | 108.128(4)                                       |
| <i>V</i> [Å <sup>3</sup> ]                 | 3479.60(9)                                       | 4711(5)                                                           | 4428.9(4)                                                     | 1973.3(3)                                            | 2421.99(16)                                      |
| <i>Z</i>                                   | 8                                                | 4                                                                 | 4                                                             | 4                                                    | 4                                                |
| $\rho_{\text{calc}}$ [g cm <sup>-3</sup> ] | 1.193                                            | 0.985                                                             | 1.214                                                         | 1.213                                                | 1.087                                            |
| $\mu$ [mm <sup>-1</sup> ]                  | 1.708                                            | 0.149                                                             | 0.168                                                         | 0.180                                                | 1.331                                            |
| <i>F</i> (000)                             | 1360                                             | 1522                                                              | 1760                                                          | 776                                                  | 848                                              |
| Crystal size [mm <sup>3</sup> ]            | 0.34×0.27×0.21                                   | 0.7×0.18×0.08                                                     | 0.15×0.08×0.06                                                | 0.3×0.27×0.24                                        | 0.36×0.246×0.06                                  |
| Crystal colour                             | colourless                                       | colourless                                                        | colourless                                                    | colourless                                           | colourless                                       |
| Crystal shape                              | block                                            | parallelepiped                                                    | parallelepiped                                                | prismatic                                            | plate                                            |
| Radiation                                  | CuK $\alpha$<br>( $\lambda$ =1.54184 Å)          | MoK $\alpha$<br>( $\lambda$ =0.71073 Å)                           | MoK $\alpha$<br>( $\lambda$ =0.71073 Å)                       | MoK $\alpha$<br>( $\lambda$ =0.71073 Å)              | Cu K $\alpha$<br>( $\lambda$ =1.54184 Å)         |
| 2 $\theta$ range [°]                       | 5.46 to 152.13<br>(0.79 Å)                       | 4.22 to 51.36<br>(0.82 Å)                                         | 3.87 to 56.56<br>(0.75 Å)                                     | 4.84 to 66.36<br>(0.65 Å)                            | 6.17 to 152.47<br>(0.79 Å)                       |

| Compound/<br>Parameter                                | 1a                                                               | 4a                                                               | 5a                                                                | 6a                                                               | 7a                                                               |
|-------------------------------------------------------|------------------------------------------------------------------|------------------------------------------------------------------|-------------------------------------------------------------------|------------------------------------------------------------------|------------------------------------------------------------------|
| Index ranges                                          | -13 ≤ h ≤ 13<br>-12 ≤ k ≤ 10<br>-40 ≤ l ≤ 40                     | -12 ≤ h ≤ 12<br>-35 ≤ k ≤ 35<br>-19 ≤ l ≤ 19                     | -14 ≤ h ≤ 12<br>-18 ≤ k ≤ 18<br>-39 ≤ l ≤ 39                      | -15 ≤ h ≤ 15<br>-19 ≤ k ≤ 19<br>-21 ≤ l ≤ 17                     | -18 ≤ h ≤ 18<br>-7 ≤ k ≤ 10<br>-24 ≤ l ≤ 24                      |
| Reflections<br>collected                              | 26013                                                            | 42998                                                            | 42302                                                             | 15579                                                            | 40282                                                            |
| Independent<br>reflections                            | 3617<br>$R_{\text{int}} = 0.0513$<br>$R_{\text{sigma}} = 0.0264$ | 8917<br>$R_{\text{int}} = 0.0812$<br>$R_{\text{sigma}} = 0.0677$ | 10977<br>$R_{\text{int}} = 0.0948$<br>$R_{\text{sigma}} = 0.0881$ | 6725<br>$R_{\text{int}} = 0.0325$<br>$R_{\text{sigma}} = 0.0435$ | 5047<br>$R_{\text{int}} = 0.0468$<br>$R_{\text{sigma}} = 0.0223$ |
| Completeness                                          | 99.9 %                                                           | 99.7 %                                                           | 99.9 %                                                            | 99.0 %                                                           | 100.0 %                                                          |
| Data /<br>Restraints /<br>Parameters                  | 3617/0/206                                                       | 8917/139/512                                                     | 10977/0/521                                                       | 6725/0/235                                                       | 5047/169/366                                                     |
| Goodness-of-<br>fit on $F^2$                          | 1.067                                                            | 1.151                                                            | 1.068                                                             | 1.046                                                            | 1.045                                                            |
| Final $R$<br>indexes<br>[ $\geq 2\sigma(I)$ ]         | $R_1 = 0.0652$<br>$wR_2 = 0.1697$                                | $R_1 = 0.1158$<br>$wR_2 = 0.2716$                                | $R_1 = 0.0656$<br>$wR_2 = 0.1337$                                 | $R_1 = 0.0344$<br>$wR_2 = 0.0859$                                | $R_1 = 0.0469$<br>$wR_2 = 0.1325$                                |
| Final $R$<br>indexes<br>[all data]                    | $R_1 = 0.0672$<br>$wR_2 = 0.1707$                                | $R_1 = 0.1591$<br>$wR_2 = 0.2965$                                | $R_1 = 0.0972$<br>$wR_2 = 0.1467$                                 | $R_1 = 0.0368$<br>$wR_2 = 0.0871$                                | $R_1 = 0.0527$<br>$wR_2 = 0.1414$                                |
| Largest<br>peak/hole<br>[ $\text{e}\text{\AA}^{-3}$ ] | 0.91/-0.41                                                       | 0.86/-0.28                                                       | 0.66/-0.41                                                        | 0.50/-0.24                                                       | 0.22/-0.37                                                       |
| Flack X<br>parameter                                  | -                                                                | -                                                                | -                                                                 | 0.50(6)                                                          | -                                                                |

**Table S2:** Selected bond lengths (Å) and bond angles (°) of **1a**, **4a–7a**.

| Compound/<br>Parameter     | <b>1a</b>             | <b>4a</b>             | <b>5a</b>                 | <b>6a</b>             | <b>7a</b>              |
|----------------------------|-----------------------|-----------------------|---------------------------|-----------------------|------------------------|
| C(cat)-C(cat)              | 1.390(4)-<br>1.404(4) | 1.390(7)-<br>1.415(7) | 1.387(3)-<br>1.405(3)     | 1.397(2)-<br>1.404(2) | 1.395(2)-<br>1.406(2)  |
| O1(OH)-C(cat)              | 1.362(4)              | 1.358(5),<br>1.373(6) | 1.360(3),<br>1.360(3)     | 1.364(18)             | 1.353(18)              |
| O2(OH)-C(cat)              | 1.364(4)              | 1.360(6),<br>1.363(6) | 1.371(3),<br>1.367(3)     | 1.364(18)             | 1.351(2)               |
| C( <sup>t</sup> Bu)-C(cat) | 1.534(4),<br>1.545(4) | 1.539(7)-<br>1.576(7) | 1.530(3)-<br>1.557(3)     | 1.537(2),<br>1.546(2) | 1.539(2),<br>1.539(2)  |
| S-C(cat)                   | 1.789(3)              | 1.788(5),<br>1.795(5) | 1.789(2),<br>1.788(2)     | 1.784(15)             | 1.782(15)              |
| S-O                        | 1.532(2)              | 1.512(4),<br>1.526(4) | 1.528(17),<br>1.527(17)   | 1.525(11)             | 1.519(14)              |
| S-C(R)                     | 1.838(3)              | 1.846(7),<br>1.811(7) | 1.865(2),<br>1.892(2)     | 1.838(15)             | 1.810(8),<br>1.797(10) |
| O-S-C(cat)                 | 105.37(13)            | 105.7(2),<br>104.2(2) | 105.69(10),<br>105.03(10) | 106.75(7)             | 105.85(7)              |
| O-S-C(R)                   | 104.26(13)            | 110.0(3),<br>103.6(3) | 105.37(10),<br>106.30(10) | 105.16(7)             | 108.9(4),<br>100.9(5)  |
| C(cat)-S-C(R)              | 100.16(14)            | 100.5(3),<br>101.1(3) | 104.45(11),<br>103.30(11) | 97.00                 | 103.4(3)<br>100.8(4)   |
| C(OH)-C(cat)-S             | 115.2(2)              | 116.7(3),<br>115.2(4) | 116.92(18),<br>116.38(18) | 116.33(11)            | 116.15(11)             |
| C(OH)-C(cat)-S             | 124.5(2)              | 123.3(3),<br>124.9(4) | 122.95(18),<br>123.28(17) | 122.93(11)            | 123.22(13)             |
| C(R)-S-C(cat)-<br>C(OH)    | 66.7(2)               | 83.3(5),<br>76.4(9)   | 77.4(2),<br>72.4(2)       | 74.35(12)             | 84.3(5)                |

**Table S3.** C-H...A interactions in crystals of **1a**, **4a–7a**

| Interaction    | Symmetry                 | C–H, Å  | H...A, Å | C...A, Å   | C–H–A, deg. |
|----------------|--------------------------|---------|----------|------------|-------------|
| <b>1a</b>      |                          |         |          |            |             |
| O16-H16...O17  | -                        | 0.79(4) | 2.17(4)  | 2.630(3)   | 118(3)      |
| O16-H16...O18  | 3/2-x, -1/2+y, z         | 0.79(4) | 2.13(4)  | 2.808(3)   | 145(4)      |
| O17-H17...S1   |                          | 0.78(4) | 2.50(3)  | 2.957(3)   | 119(3)      |
| O17-H17...O18  |                          | 0.78(4) | 1.91(4)  | 2.639(3)   | 156(3)      |
| C10-H10A...S1  |                          | 0.98    | 2.61     | 3.308(3)   | 129         |
| C11-H11C...S1  |                          | 0.98    | 2.63     | 3.357(4)   | 131         |
| C13-H13C...O16 |                          | 0.98    | 2.41     | 3.054(4)   | 123         |
| C14-H14A...O16 |                          | 0.98    | 2.29     | 2.958(4)   | 125         |
| C19-H19...O17  |                          | 1.00    | 2.49     | 3.141(4)   | 123         |
| C21-H21B...O17 | 1-x, -1/2+y, 1/2-z       | 0.98    | 2.58     | 3.190(4)   | 120         |
| <b>4a</b>      |                          |         |          |            |             |
| O2-H2 ...S1    |                          | 0.82    | 2.64     | 2.988(4)   | 108         |
| O2-H2 ...O1    |                          | 0.82    | 1.87     | 2.563(6)   | 141         |
| O3-H3 ...O2    |                          | 0.82    | 2.18     | 2.640(5)   | 116         |
| O3-H3 ...O4    | 1/2+x, 3/2-y,<br>1/2+z   | 0.82    | 2.01     | 2.774(6)   | 154         |
| O5-H5 ...S2    |                          | 0.82    | 2.43     | 2.935(4)   | 121         |
| O5-H5 ...O4    |                          | 0.82    | 1.83     | 2.579(6)   | 151         |
| O6-H6 ...O5    |                          | 0.82    | 2.19     | 2.649(6)   | 116         |
| O6-H6 ...O1    | 1/2+x, 3/2-y, -<br>1/2+z | 0.82    | 1.99     | 2.758(6)   | 155         |
| C9-H9C...O3    |                          | 0.96    | 2.36     | 3.019(10)  | 126         |
| C10-H10A..O3   |                          | 0.96    | 2.35     | 2.993(7)   | 124         |
| C12-H12C..S1   |                          | 0.96    | 2.49     | 3.218(7)   | 132         |
| C13-H13B..S1   |                          | 0.96    | 2.66     | 3.374(7)   | 131         |
| C19-H19A..O1   |                          | 0.97    | 2.57     | 3.114(12)  | 115         |
| C27-H27A..O6   |                          | 0.96    | 2.32     | 2.989(9)   | 126         |
| C29-H29B..O6   |                          | 0.96    | 2.36     | 3.012(8)   | 124         |
| C31-H31A..S2   |                          | 0.96    | 2.59     | 3.281(7)   | 130         |
| C32-H32B..S2   |                          | 0.96    | 2.70     | 3.407(8)   | 131         |
| C34-H34...O5   |                          | 0.98    | 2.47     | 3.125(8)   | 124         |
| <b>5a</b>      |                          |         |          |            |             |
| O1-H1...S1     |                          | 0.84    | 2.54     | 2.9982(17) | 115         |
| O1-H1...O3     |                          | 0.84    | 1.80     | 2.573(2)   | 152         |
| O2-H2...O1     |                          | 0.84    | 2.21     | 2.651(2)   | 113         |
| O2-H2...O6     |                          | 0.84    | 2.02     | 2.790(2)   | 152         |
| O4-H4A ...S2   |                          | 0.84    | 2.53     | 2.9569(17) | 113         |
| O4-H4A ...O6   |                          | 0.84    | 1.85     | 2.608(2)   | 150         |

| Interaction   | Symmetry          | C–H, Å  | H...A, Å | C...A, Å   | C–H–A, deg. |
|---------------|-------------------|---------|----------|------------|-------------|
| O5-H5...O3    | -1+x, y, z        | 0.84    | 2.03     | 2.803(2)   | 153         |
| O5-H5...O4    |                   | 0.84    | 2.19     | 2.662(2)   | 115         |
| C9-H9B ...O2  |                   | 0.98    | 2.39     | 3.042(3)   | 124         |
| C10-H10C...O2 |                   | 0.98    | 2.35     | 3.015(3)   | 124         |
| C12-H12A...S1 |                   | 0.98    | 2.72     | 3.429(2)   | 130         |
| C13-H13C...S1 |                   | 0.98    | 2.62     | 3.311(3)   | 127         |
| C34-H34A...O5 |                   | 0.98    | 2.36     | 3.024(3)   | 124         |
| C35-H35C...O5 |                   | 0.98    | 2.35     | 3.011(3)   | 124         |
| C37-H37A...S2 |                   | 0.98    | 2.55     | 3.284(3)   | 131         |
| C38-H38C...S2 |                   | 0.98    | 2.65     | 3.354(3)   | 129         |
| C44-H44A...O1 |                   | 0.99    | 2.51     | 3.397(3)   | 148         |
| C47-H47A...O4 |                   | 0.99    | 2.49     | 3.255(3)   | 134         |
| <b>6a</b>     |                   |         |          |            |             |
| O1-H1...S1    |                   | 0.84    | 2.50     | 2.9642(12) | 115         |
| O1-H1...O3    |                   | 0.84    | 1.81     | 2.5864(16) | 152         |
| O2-H2...O1    |                   | 0.84    | 2.21     | 2.6537(16) | 113         |
| O2-H2...O3    | 1/2+x, 1/2-y, 1-z | 0.84    | 2.13     | 2.9306(16) | 159         |
| C9-H9A...O2   |                   | 0.98    | 2.36     | 3.028(2)   | 125         |
| C10-H10C...O2 |                   | 0.98    | 2.36     | 3.013(2)   | 123         |
| C12-H12C...S1 |                   | 0.98    | 2.65     | 3.3421(17) | 128         |
| C13-H13A...S1 |                   | 0.98    | 2.53     | 3.2219(17) | 127         |
| <b>7a</b>     |                   |         |          |            |             |
| O1-H1...O3    |                   | 0.87(3) | 1.72(3)  | 2.5498(19) | 158(3)      |
| O2-H2...O1    |                   | 1.02(3) | 2.23(3)  | 2.632(2)   | 102(2)      |
| O2-H2...O3    | 1-x, 1/2+y, 3/2-z | 1.02(3) | 1.74(3)  | 2.7240(19) | 160(3)      |
| C8-H8A...O2   |                   | 0.96    | 2.40     | 3.043(3)   | 124         |
| C9-H9C...O2   |                   | 0.96    | 2.28     | 2.948(3)   | 126         |

**Table S4.** C–X... $\pi$  interactions in **1a**, **4a–7a** ( $C_g$  is centroid of aromatic 5,6-membered ring; X-Perp is perpendicular distance of X on ring;  $\gamma$  is angle X $\rightarrow$  $C_g$  vector and normal to ring plane).

| Interaction                 | Symmetry          | X... $C_g$ , Å | X-Perp, Å | $\gamma$ , deg. | C–X... $C_g$ , deg. | C... $C_g$ , Å |
|-----------------------------|-------------------|----------------|-----------|-----------------|---------------------|----------------|
| <b>4a</b>                   |                   |                |           |                 |                     |                |
| C27-H27B... $C_g$ (C1-C6)   |                   | 2.97           | 2.96      | 5.07            | 139                 | 3.748(8)       |
| <b>6a</b>                   |                   |                |           |                 |                     |                |
| C13-H13C... $C_g$ (C16-C21) | 1-x, 1/2+y, 3/2-z | 2.84           | 2.79      | 11.27           | 162                 | 3.7886(19)     |
| <b>7a</b>                   |                   |                |           |                 |                     |                |
| C16A-H16A... $C_g$ (C1-C6)  |                   | 2.86           | 2.32      | 35.70           | 142                 | 3.643(17)      |

## **S1.5. Antioxidant activity assay**

### **S1.5.1. DPPH radical scavenging activity assay**

DPPH radical scavenging activity was performed according to the known method [9] with some modifications [10]. A CH<sub>3</sub>CN solution ( $C_0 = 50 \mu\text{mol}$ ) of the radical DPPH was prepared daily and protected from light. The decrease in absorbance was determined at 517 nm every minute during the first five minutes of the experiment and every next 5 min until the reaction reached a plateau at room temperature. The parameter  $EC_{50}$  is the concentration of an antioxidant necessary for decreasing the amount of DPPH radical by 50% of the initial value. To determine  $IC_{50}$ , the plot of the residual concentration of the stable radical vs molar ratio, expressed as the number of moles of the antioxidant per 1 mole of the DPPH, was constructed. The parameter ( $n_{\text{DPPH}}$ ) is the number of molecules of converted DPPH radical per one molecule of the compound ( $n_{\text{DPPH}} = C_0/(2 \times IC_{50})$ , where  $C_0$  is the initial concentration of radical).  $TEC_{50}$  is the time of achievement of an equilibrium state at the antioxidant concentration equal to  $IC_{50}$ . The antiradical efficiency (AE) was determined with the equation  $AE = 1/(IC_{50} \times TEC_{50})$ . All experiments were performed in triplicate at room temperature.

### **S1.5.2. ABTS assay**

The radical cation ABTS<sup>+</sup> is generated by the oxidation of ABTS with the K<sub>2</sub>S<sub>2</sub>O<sub>8</sub>. The reduction in the intensity of greenish coloration characteristic of this radical reflects the ability of the antioxidants to scavenge the radical cation [11]. The absorbance of ABTS radical cation solutions ( $\lambda = 734 \text{ nm}$ ) in the presence of compounds concentrations (1–40  $\mu\text{M}$ ) and calculation of the  $IC_{50}$  values were carried out following a previously published method [12]. Ethanol was the solvent for all compounds. The absorbance ( $A_i$ ) reading was taken at room temperature exactly 1 min after initial mixing and up to 6 min. All measurements were carried out at least three times. The  $IC_{50}$  values were calculated as the minimum concentration of each sample required to inhibit 50% of the ABTS radical.

## S2. NMR-spectra

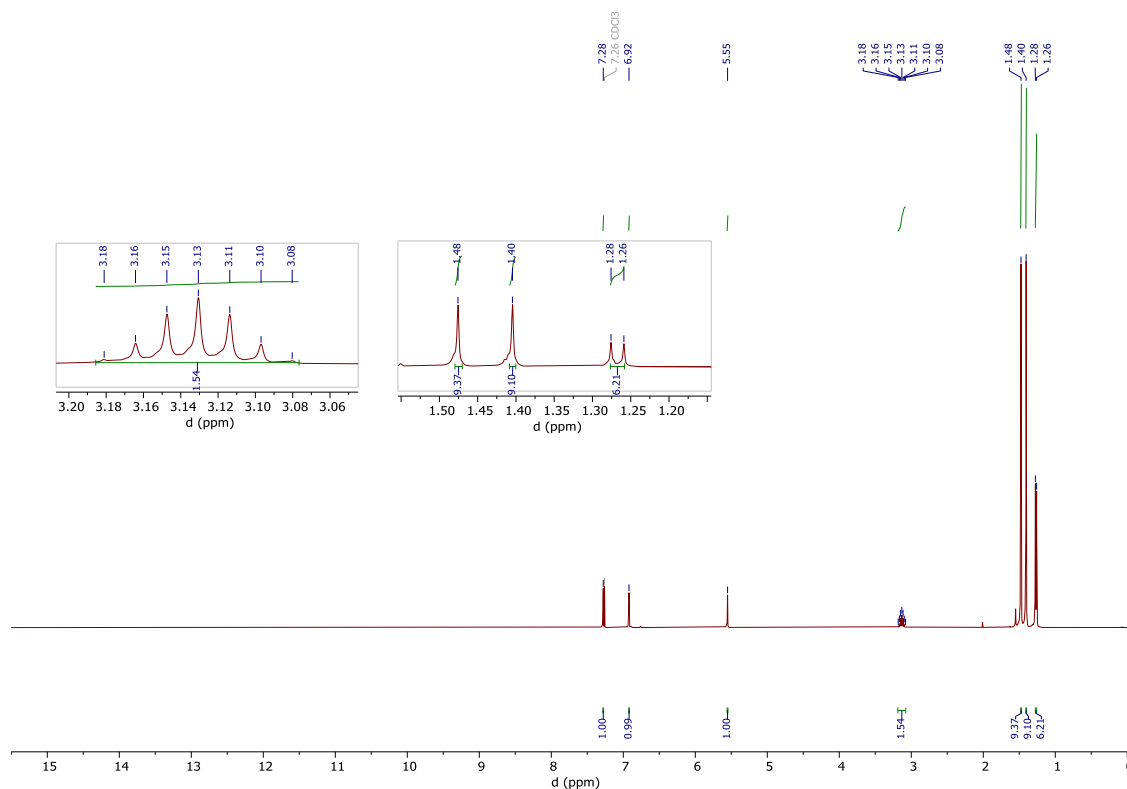

**Figure S1.** The  $^1\text{H}$  NMR spectrum of 4,6-di-*tert*-butyl-3-(isopropylthio)benzene-1,2-diol (**1**) (400 MHz,  $\text{CDCl}_3$ ).

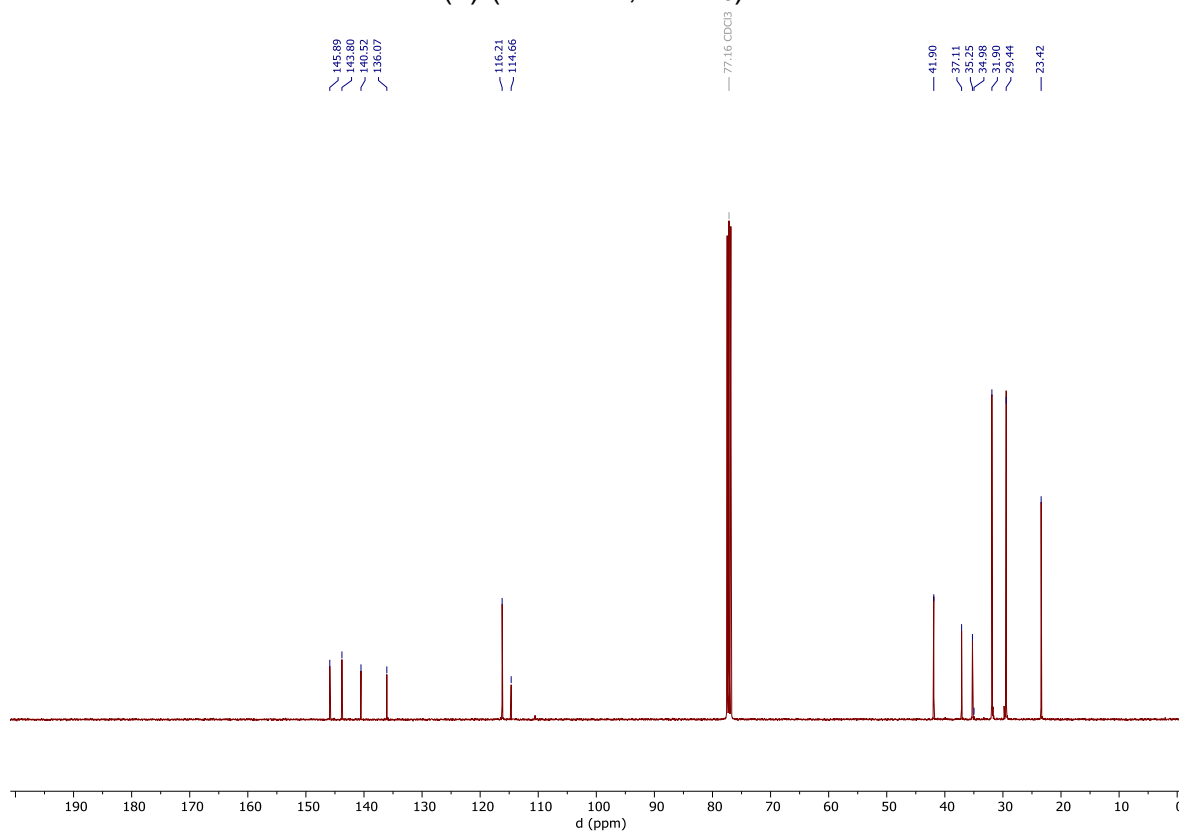

**Figure S2.** The  $^{13}\text{C}\{^1\text{H}\}$  NMR spectrum of 4,6-di-*tert*-butyl-3-(isopropylthio)benzene-1,2-diol (**1**) (100 MHz,  $\text{CDCl}_3$ ).

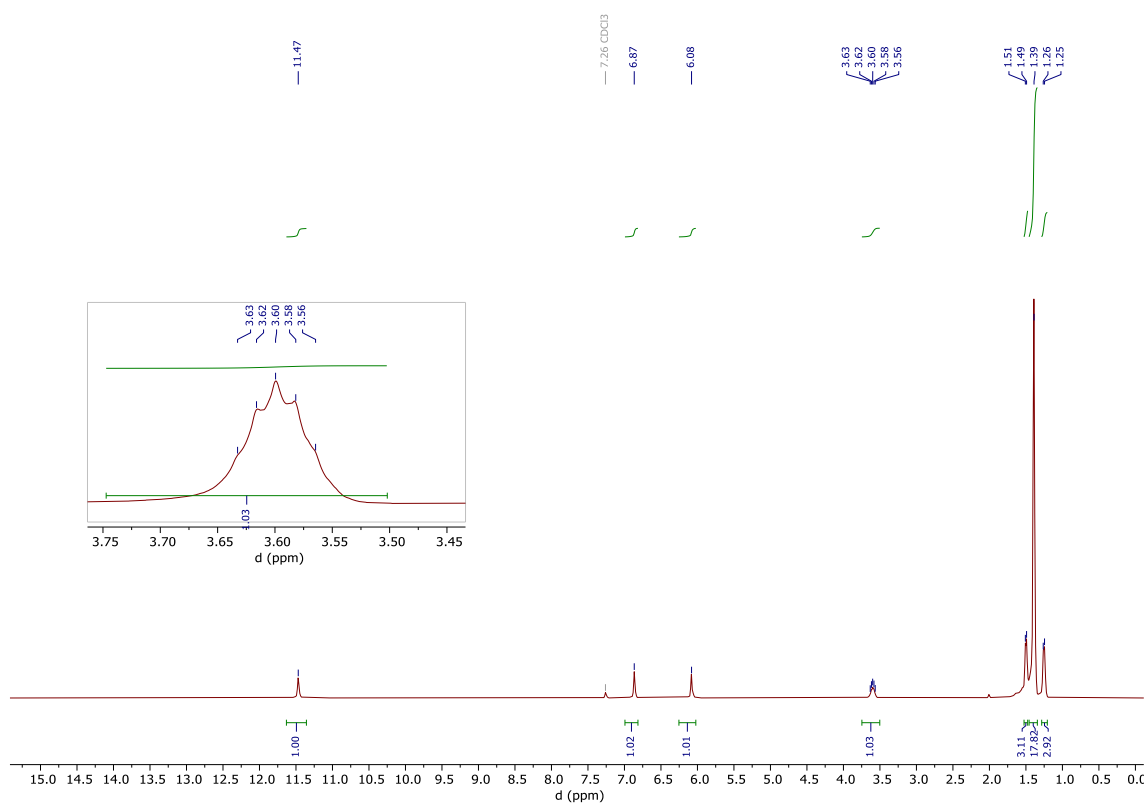

**Figure S3.** The  $^1\text{H}$  NMR spectrum of 4,6-di-*tert*-butyl-3-(isopropylsulfinyl)benzene-1,2-diol (**1a**) (400 MHz,  $\text{CDCl}_3$ ).

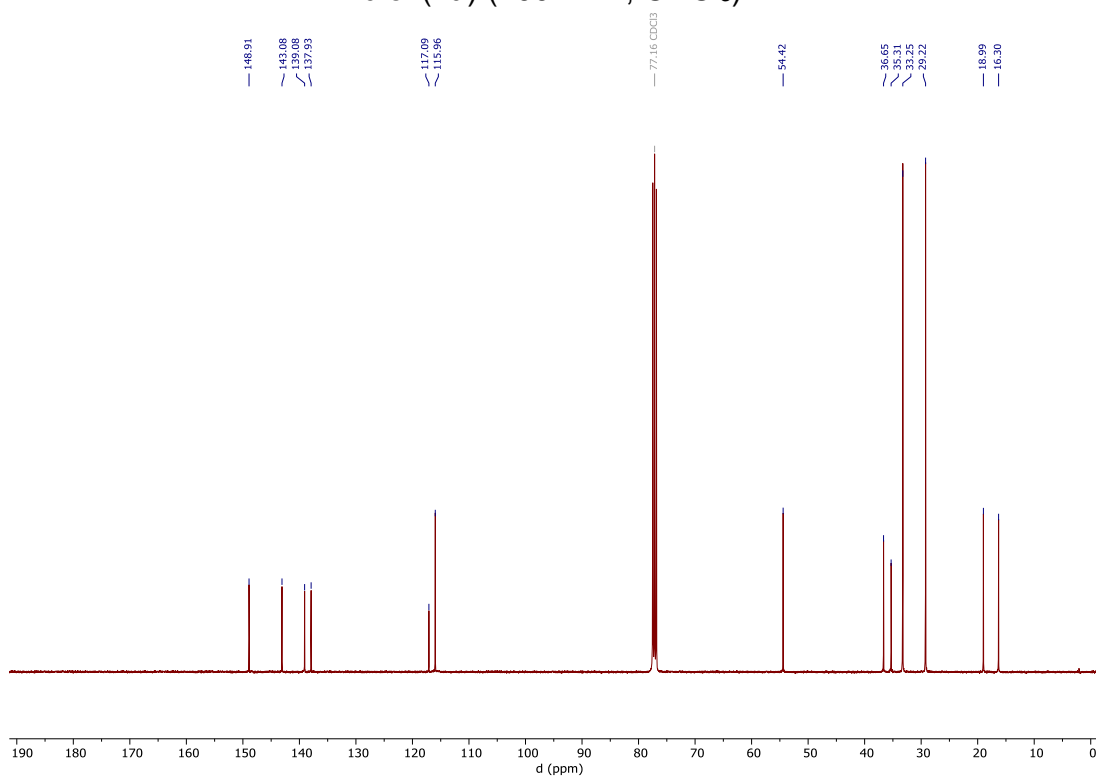

**Figure S4.** The  $^{13}\text{C}\{^1\text{H}\}$  NMR spectrum of 4,6-di-*tert*-butyl-3-(isopropylsulfinyl)benzene-1,2-diol (**1a**) (100 MHz,  $\text{CDCl}_3$ ).

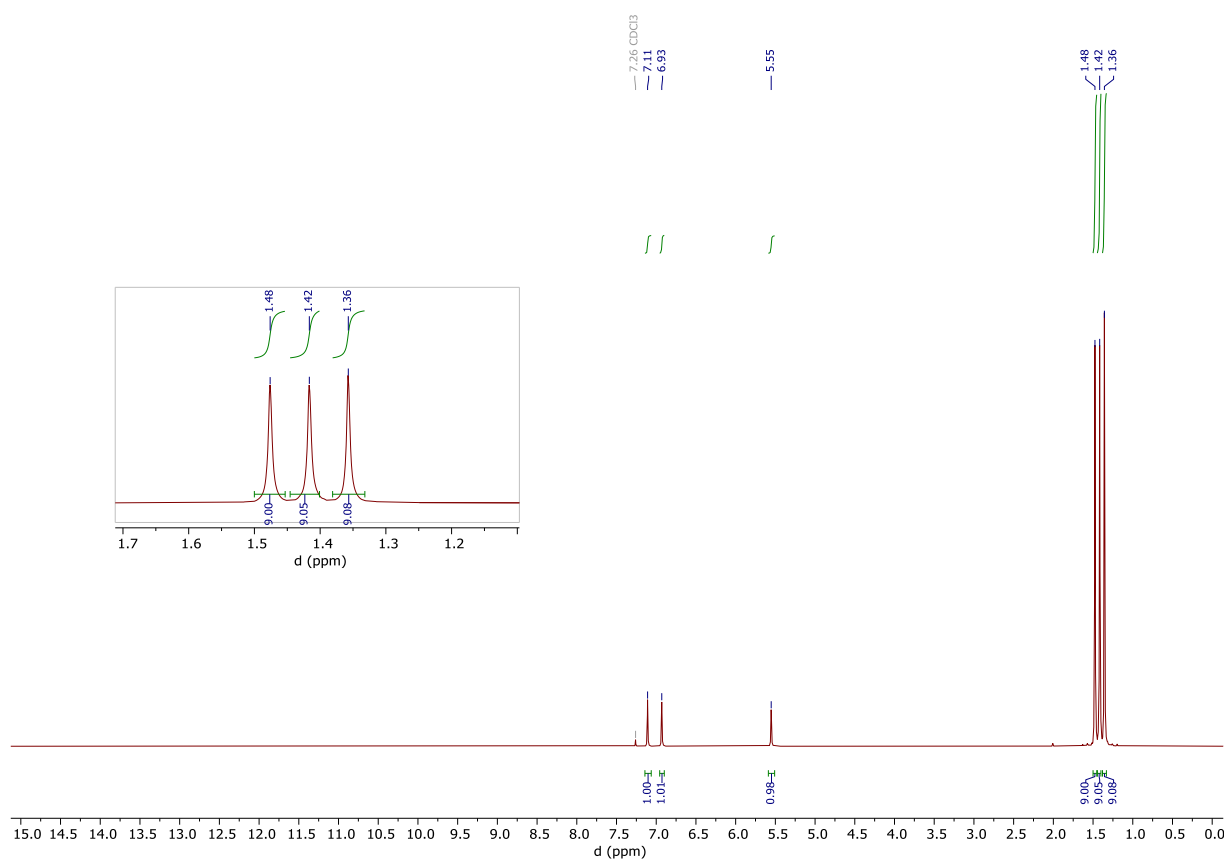

**Figure S5.** The  $^1\text{H}$  NMR spectrum of 4,6-di-*tert*-butyl-3-(*tert*-butylthio)benzene-1,2-diol (**2**) (400 MHz,  $\text{CDCl}_3$ ).

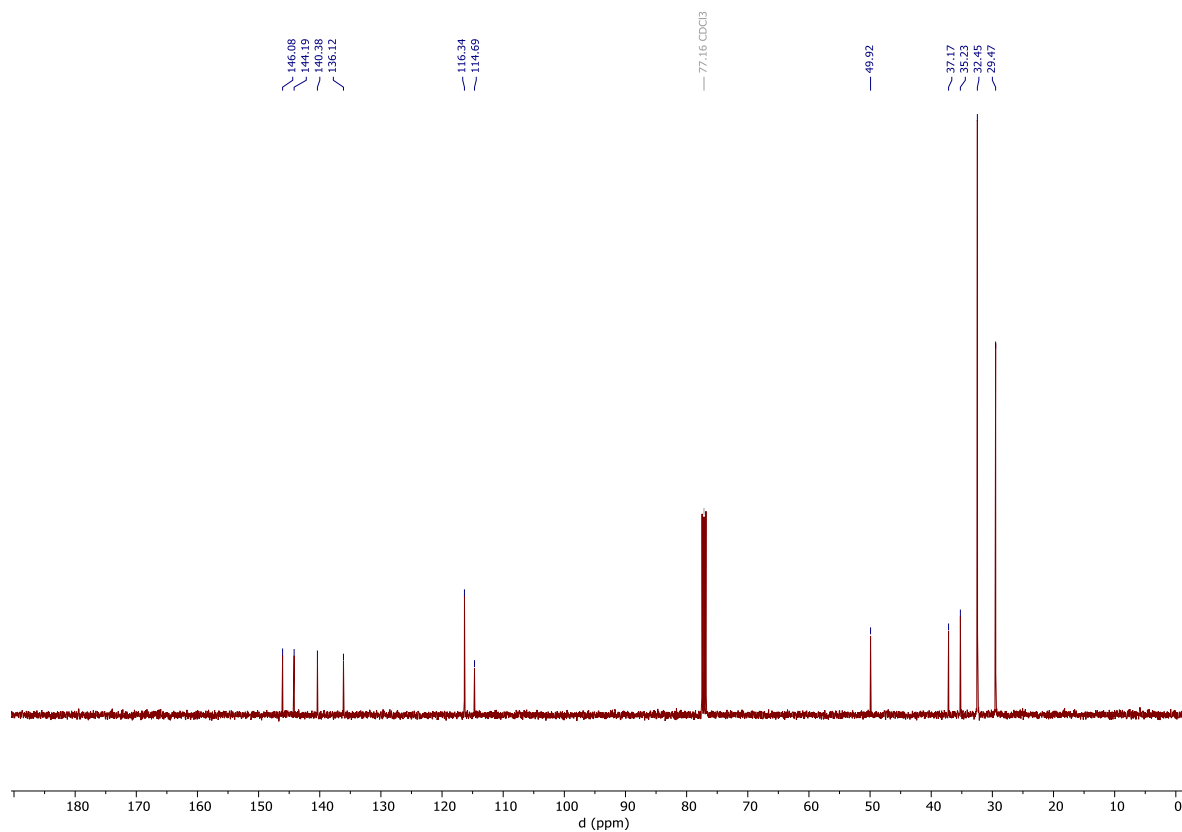

**Figure S6.** The  $^{13}\text{C}\{^1\text{H}\}$  NMR spectrum of 4,6-di-*tert*-butyl-3-(*tert*-butylthio)benzene-1,2-diol (**2**) (100 MHz,  $\text{CDCl}_3$ ).

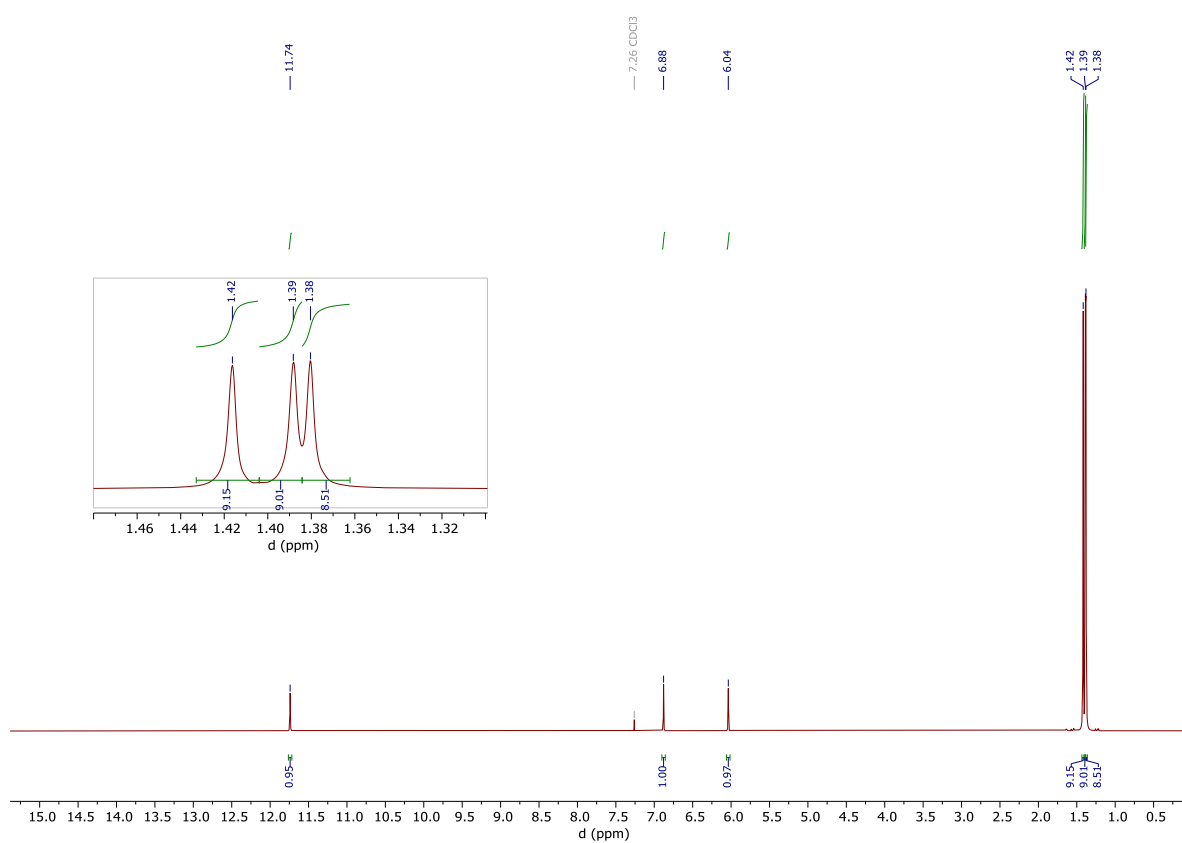

**Figure S7.** The  $^1\text{H}$  NMR spectrum of 4,6-di-*tert*-butyl-3-(*tert*-butylsulfinyl)benzene-1,2-diol (**2a**) (400 MHz,  $\text{CDCl}_3$ ).

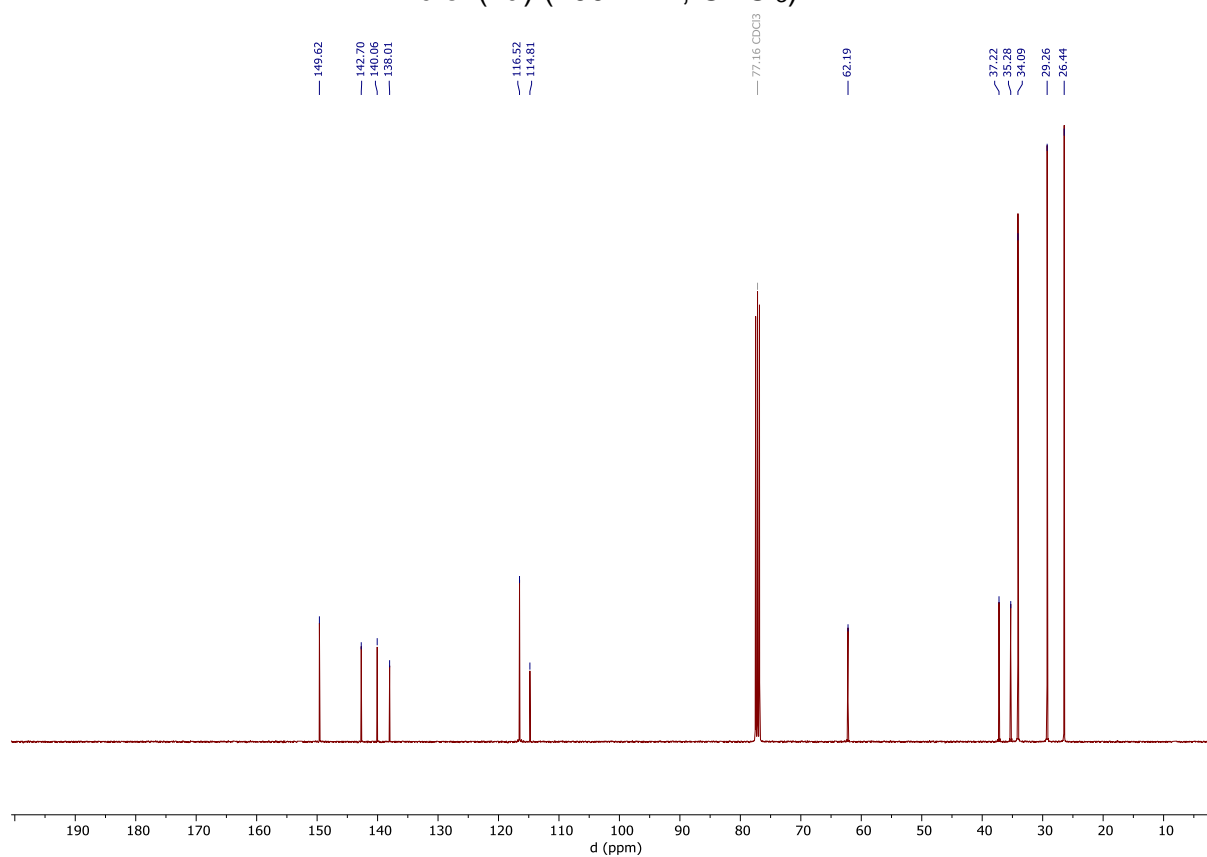

**Figure S8.** The  $^{13}\text{C}\{^1\text{H}\}$  NMR spectrum of 4,6-di-*tert*-butyl-3-(*tert*-butylsulfinyl)benzene-1,2-diol (**2a**) (100 MHz,  $\text{CDCl}_3$ ).

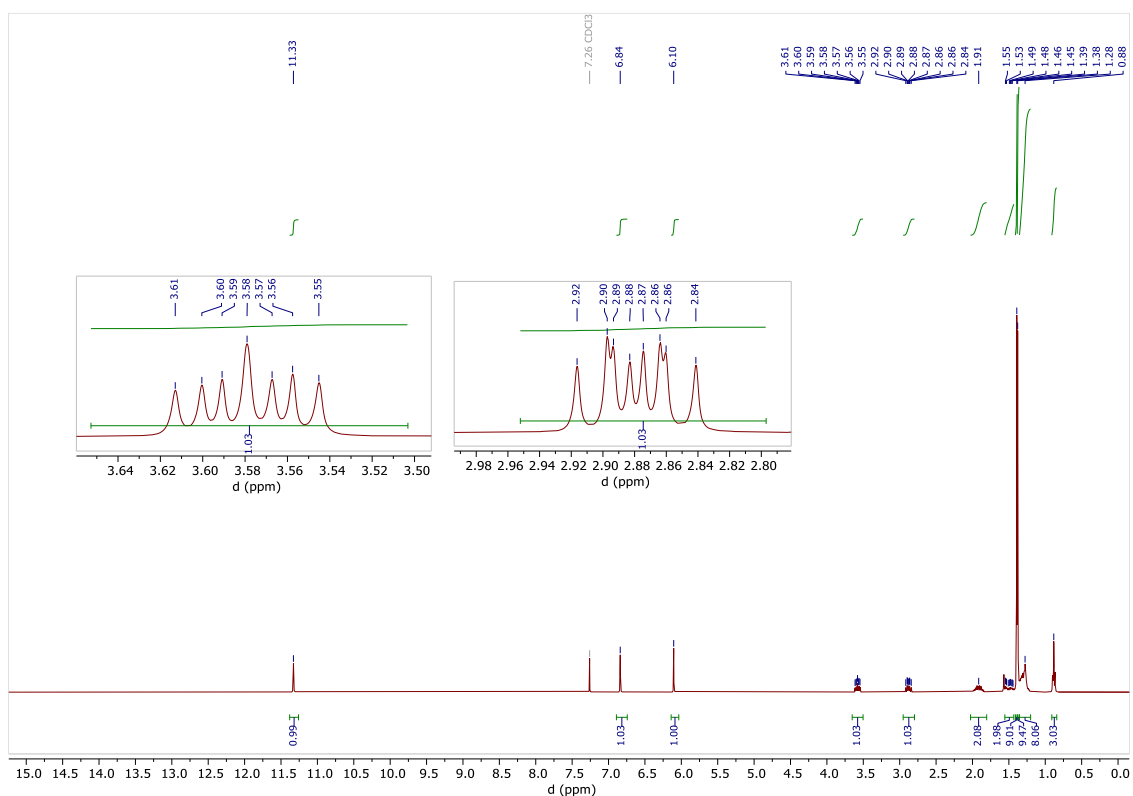

**Figure S9.** The <sup>1</sup>H NMR spectrum of 4,6-di-*tert*-butyl-3-(octylsulfinyl)benzene-1,2-diol (**3a**) (400 MHz, CDCl<sub>3</sub>).

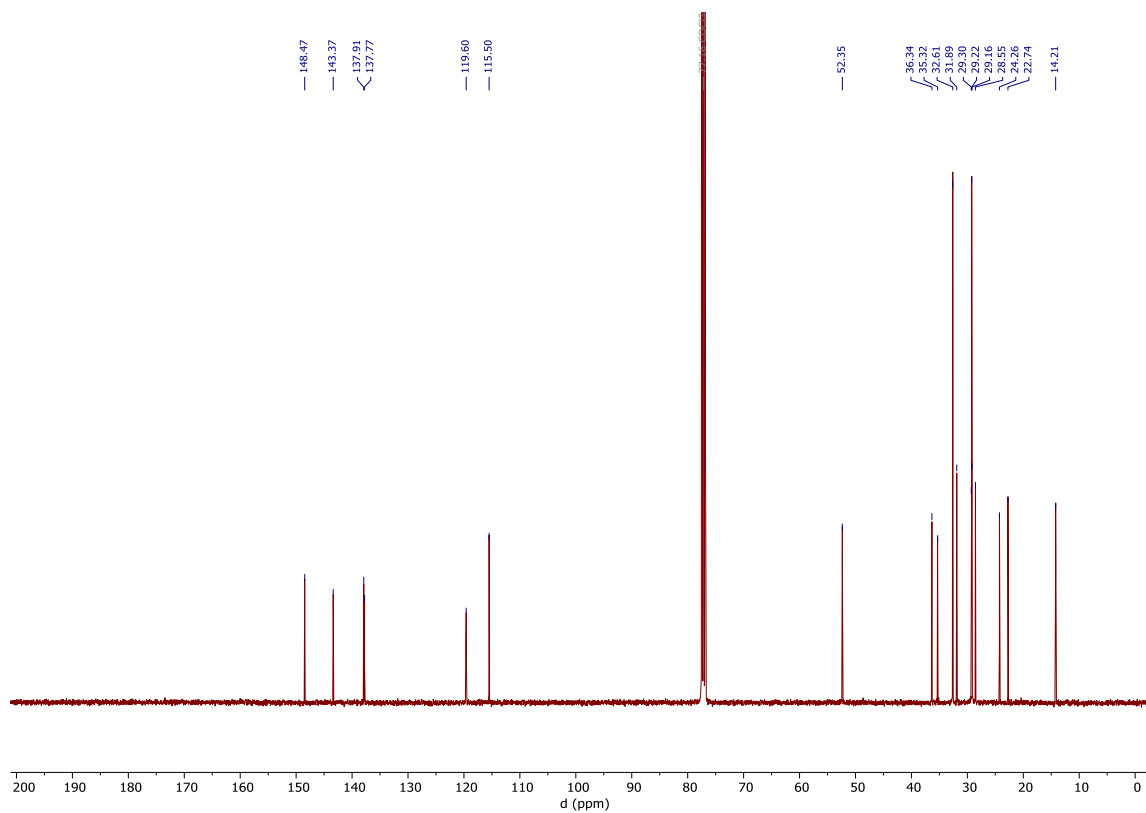

**Figure S10.** The <sup>13</sup>C{<sup>1</sup>H} NMR spectrum of 4,6-di-*tert*-butyl-3-(octylsulfinyl)benzene-1,2-diol (**3a**) (100 MHz, CDCl<sub>3</sub>).

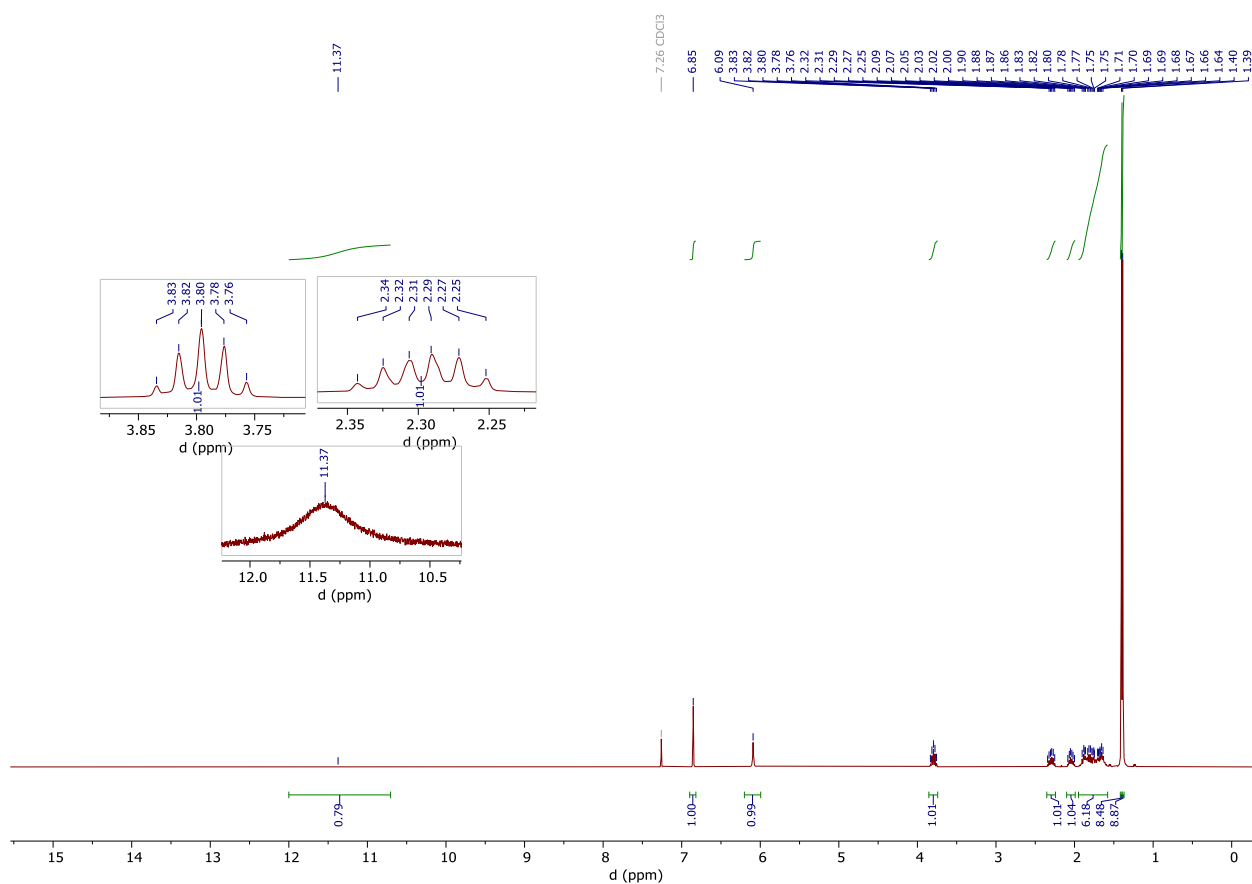

**Figure S11.** The  $^1\text{H}$  NMR spectrum of 4,6-di-*tert*-butyl-3-(cyclopentylsulfinyl)benzene-1,2-diol (**4a**) (400 MHz,  $\text{CDCl}_3$ ).

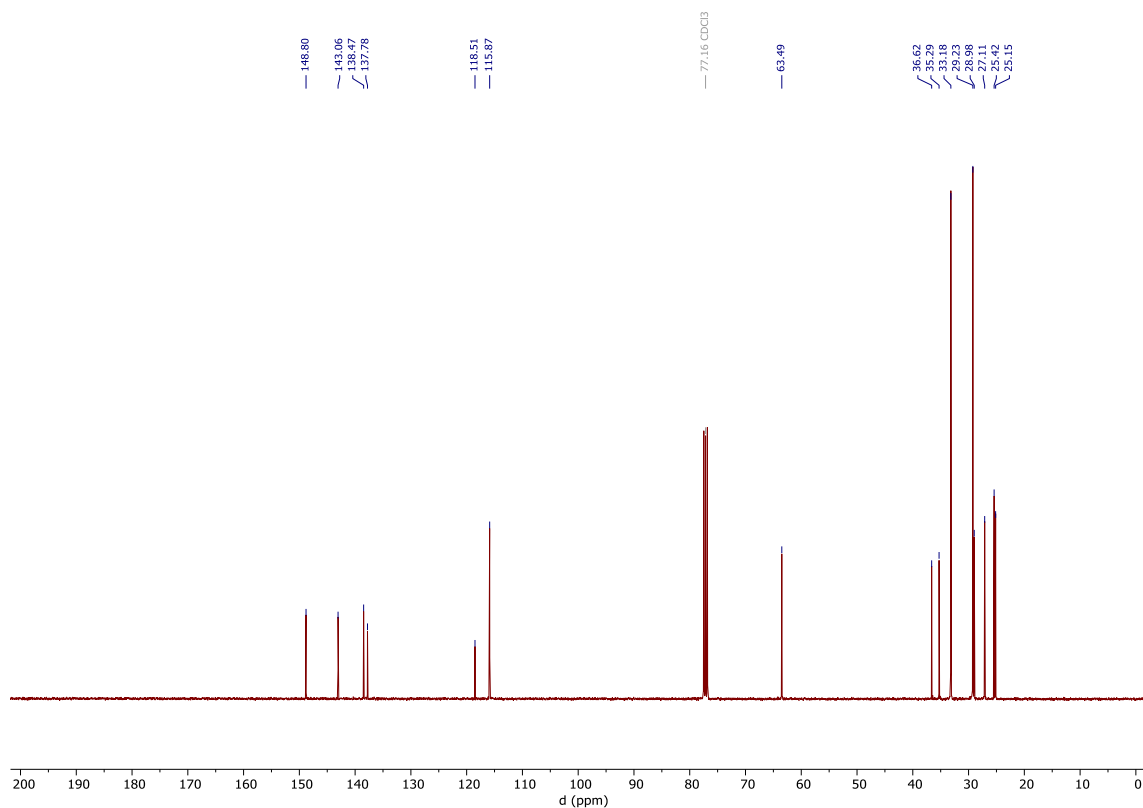

**Figure S12.** The  $^{13}\text{C}\{^1\text{H}\}$  NMR spectrum of 4,6-di-*tert*-butyl-3-(cyclopentylsulfinyl)benzene-1,2-diol (**4a**) (100 MHz,  $\text{CDCl}_3$ ).

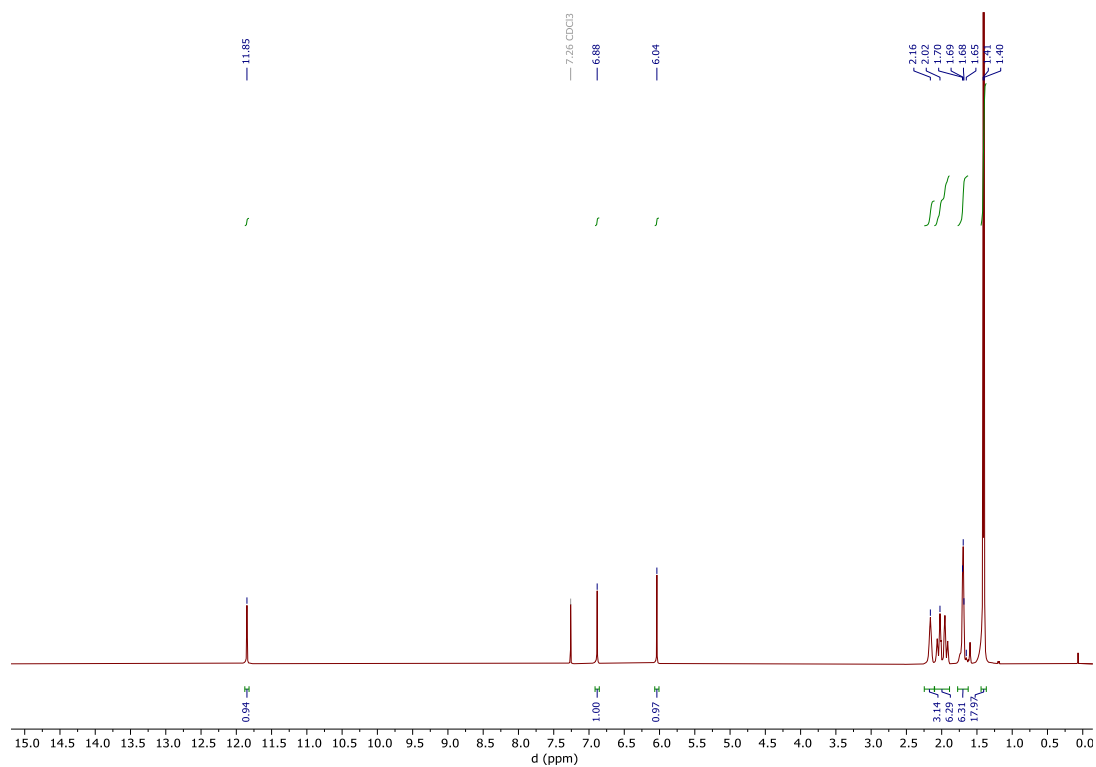

**Figure S13.** The  $^1\text{H}$  NMR spectrum of 3-(((3s,5s,7s)-adamantan-1-yl)sulfinyl)-4,6-di-*tert*-butylbenzene-1,2-diol (**5a**) (300 MHz,  $\text{CDCl}_3$ ).

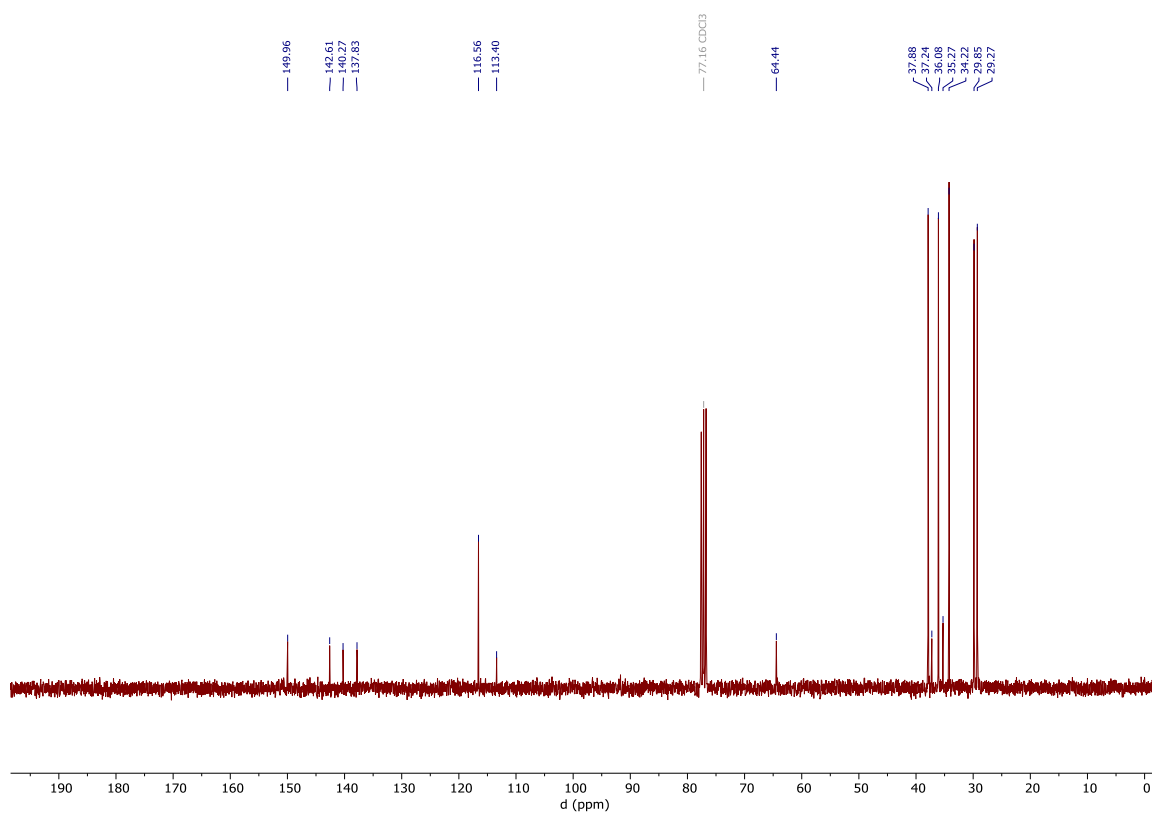

**Figure S14.** The  $^{13}\text{C}\{^1\text{H}\}$  NMR spectrum of 3-(((3s,5s,7s)-adamantan-1-yl)sulfinyl)-4,6-di-*tert*-butylbenzene-1,2-diol (**5a**) (75 MHz,  $\text{CDCl}_3$ ).

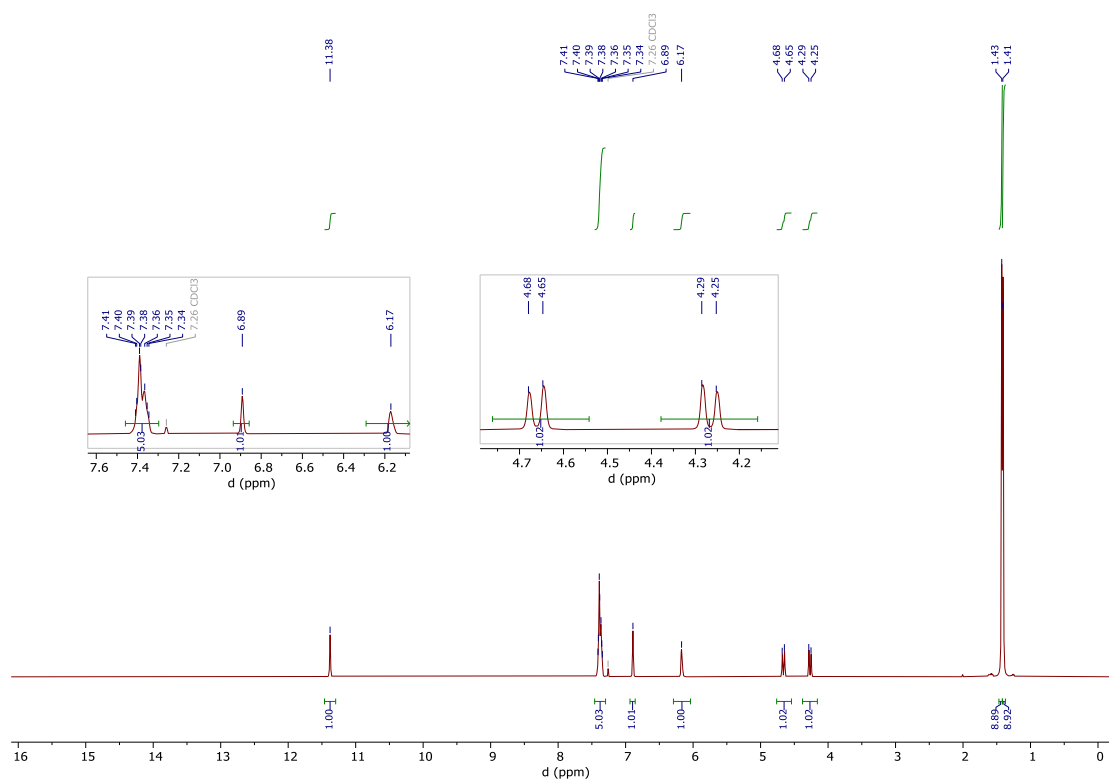

**Figure S15.** The  $^1\text{H}$  NMR spectrum of 3-(benzylsulfinyl)-4,6-di-*tert*-butylbenzene-1,2-diol (**6a**) (400 MHz,  $\text{CDCl}_3$ ).

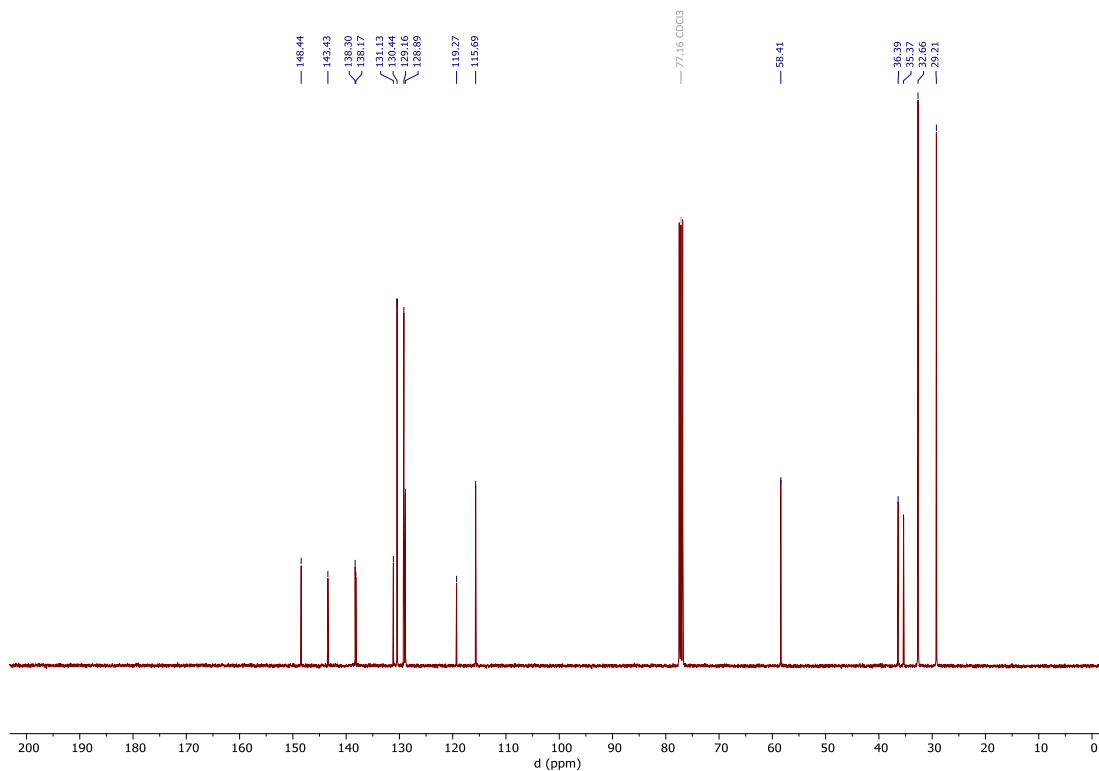

**Figure S16.** The  $^{13}\text{C}\{^1\text{H}\}$  NMR spectrum of 3-(benzylsulfinyl)-4,6-di-*tert*-butylbenzene-1,2-diol (**6a**) (100 MHz,  $\text{CDCl}_3$ ).

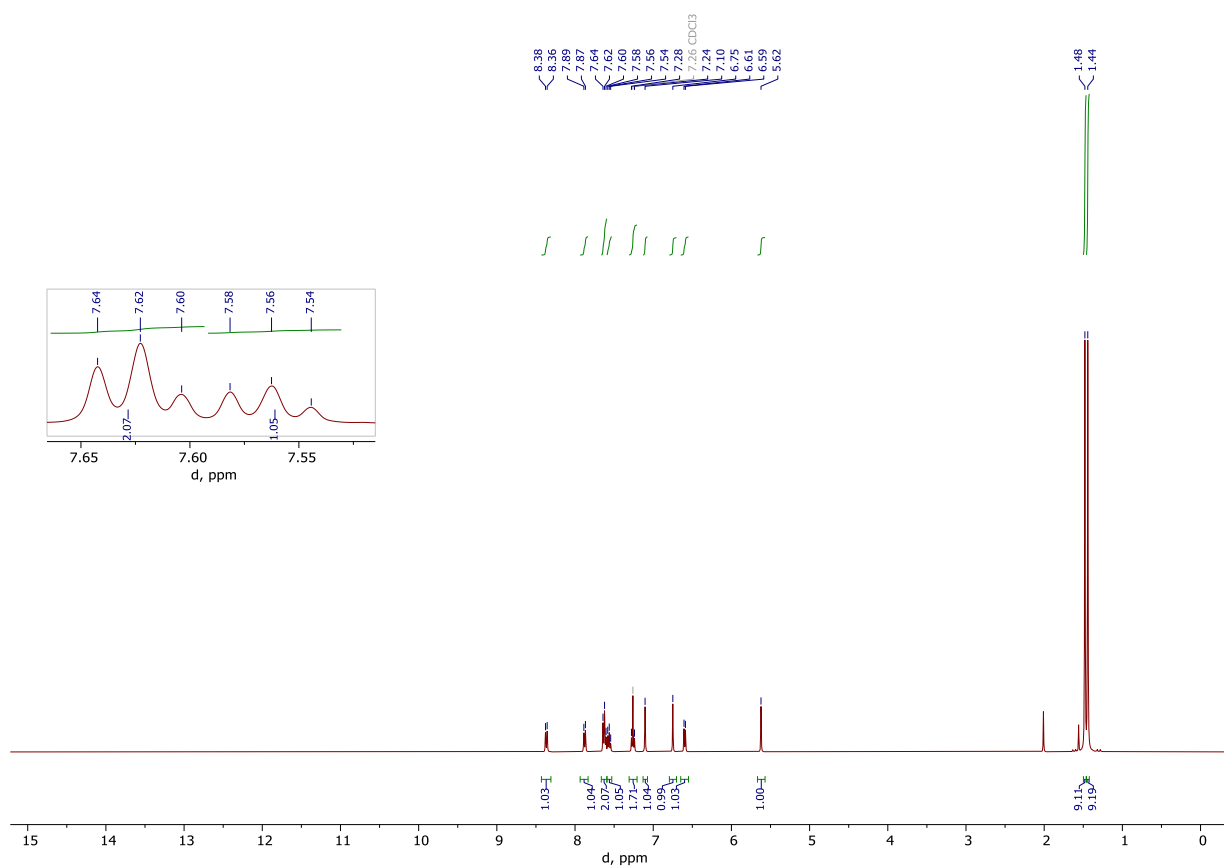

**Figure S17.** The  $^1\text{H}$  NMR spectrum of 4,6-di-*tert*-butyl-3-(naphthalen-1-ylthio)benzene-1,2-diol (**7**) (400 MHz,  $\text{CDCl}_3$ ).

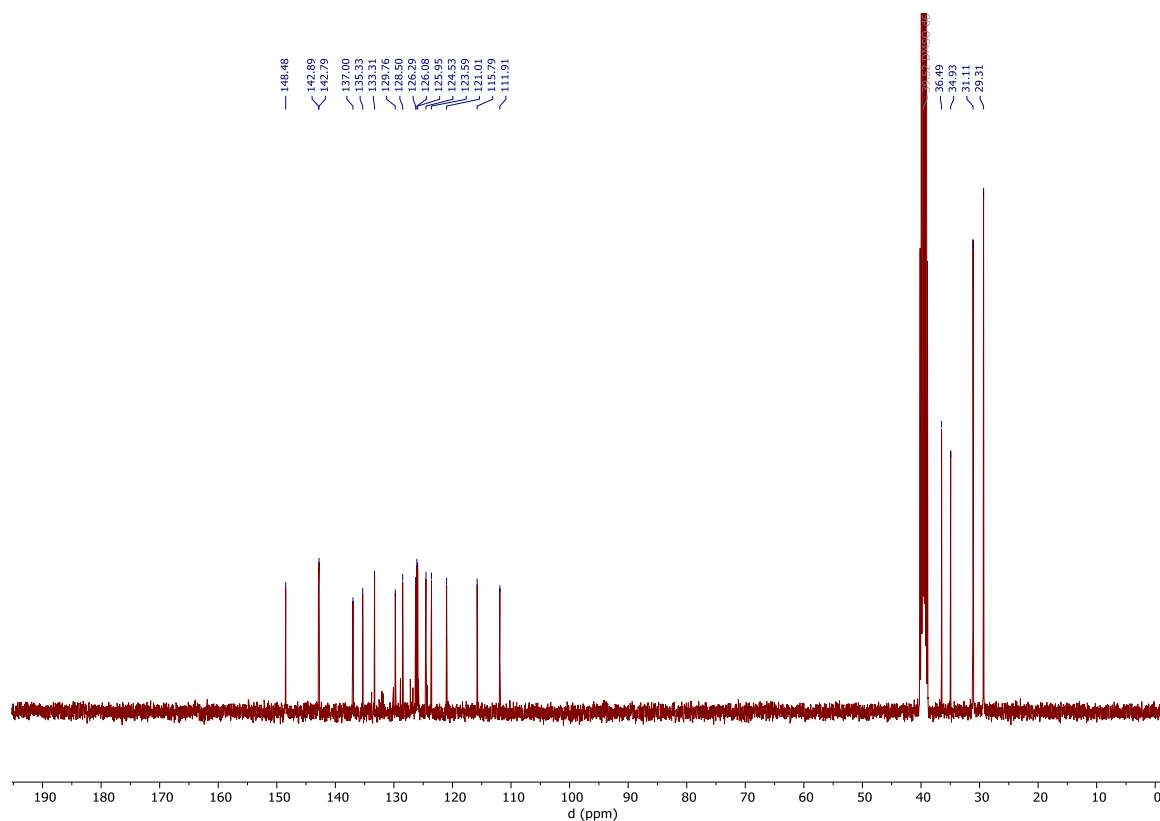

**Figure S18.** The  $^{13}\text{C}\{^1\text{H}\}$  NMR spectrum of 4,6-di-*tert*-butyl-3-(naphthalen-1-ylthio)benzene-1,2-diol (**7**) (100 MHz,  $\text{DMSO-d}_6$ ).

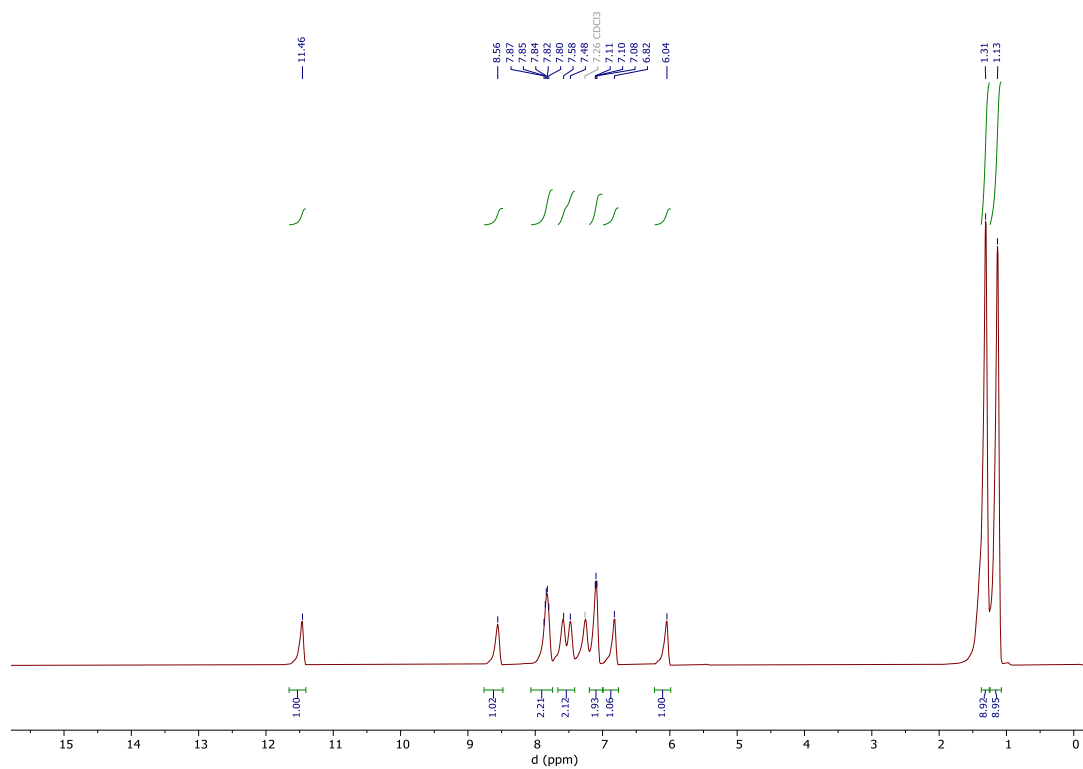

**Figure S19.** The  $^1\text{H}$  NMR spectrum of 4,6-di-*tert*-butyl-3-(naphthalen-1-ylsulfinyl)benzene-1,2-diol (**7a**) (400 MHz,  $\text{CDCl}_3$ ).

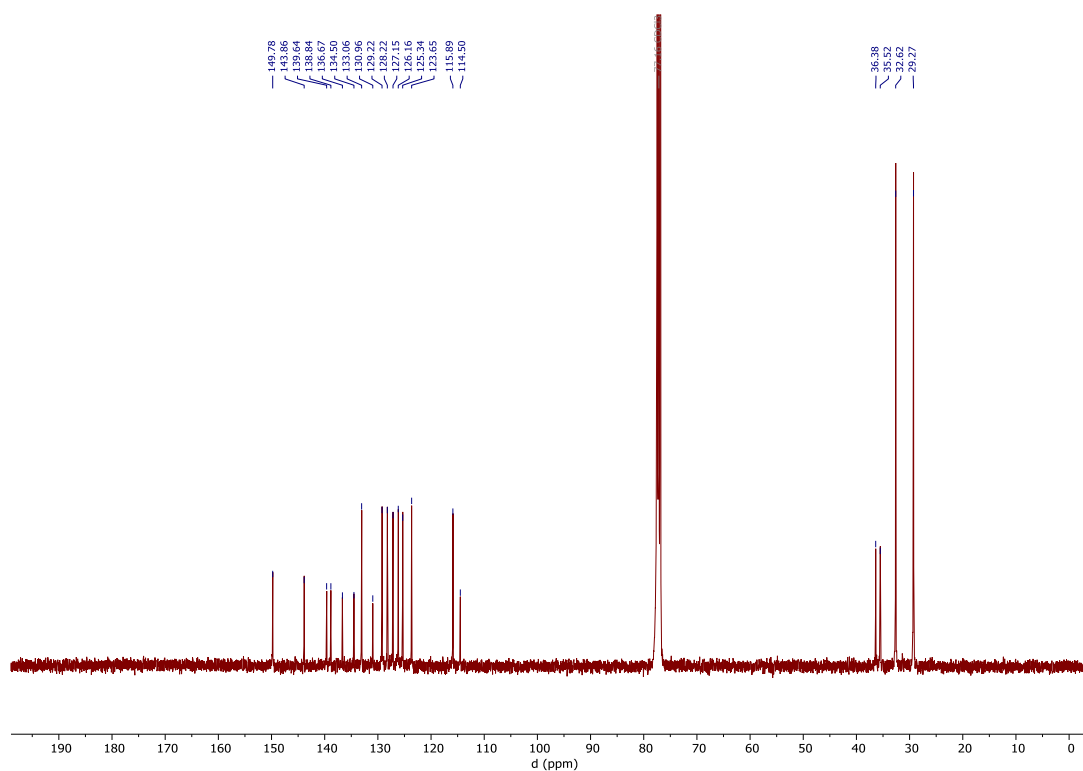

**Figure S20.** The  $^{13}\text{C}\{^1\text{H}\}$  NMR spectrum of 4,6-di-*tert*-butyl-3-(naphthalen-1-ylsulfinyl)benzene-1,2-diol (**7a**) (100 MHz,  $\text{CDCl}_3$ ).

### S3. HRMS-Spectra

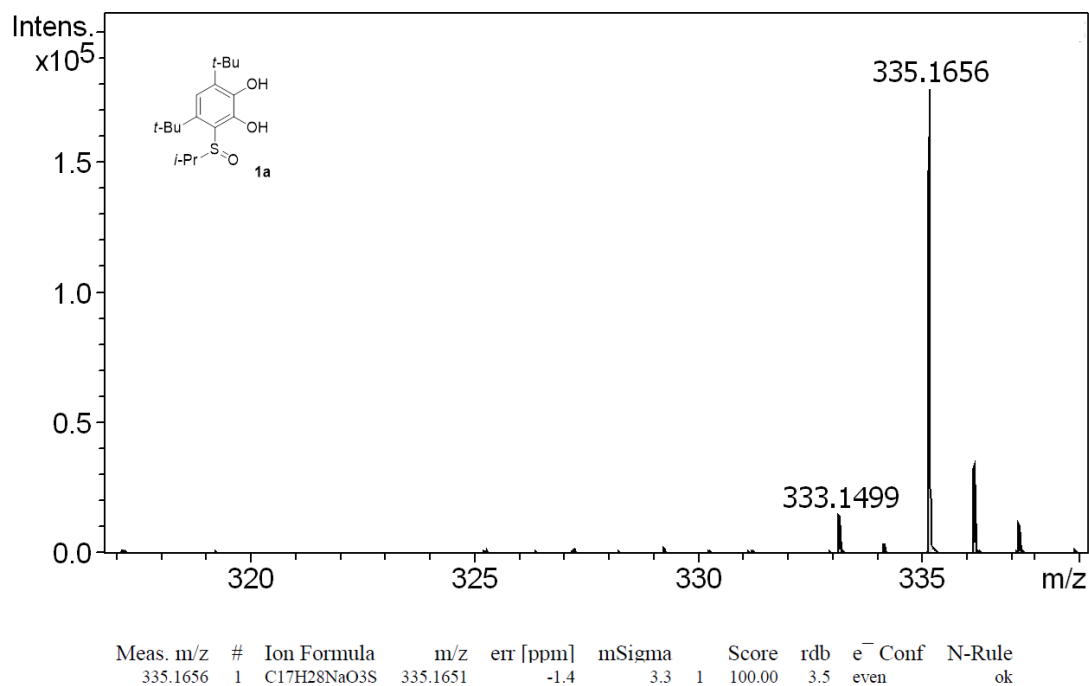

Figure S21. HRMS spectra of **1a**.

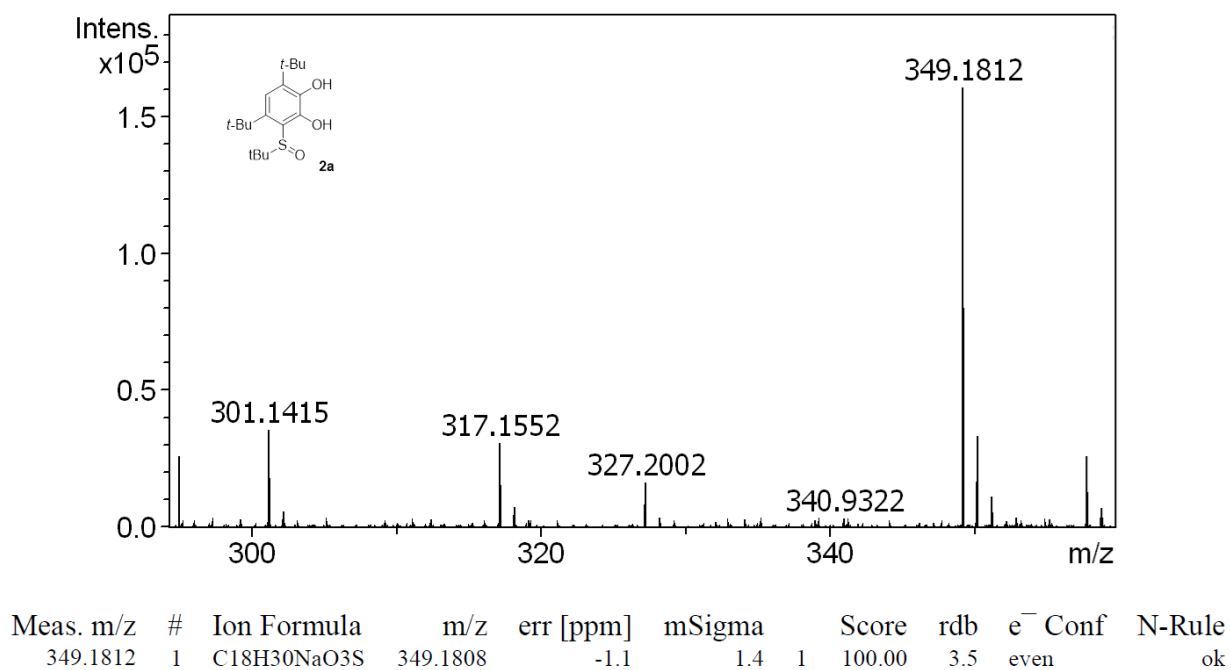

Figure S22. HRMS spectra of **2a**.

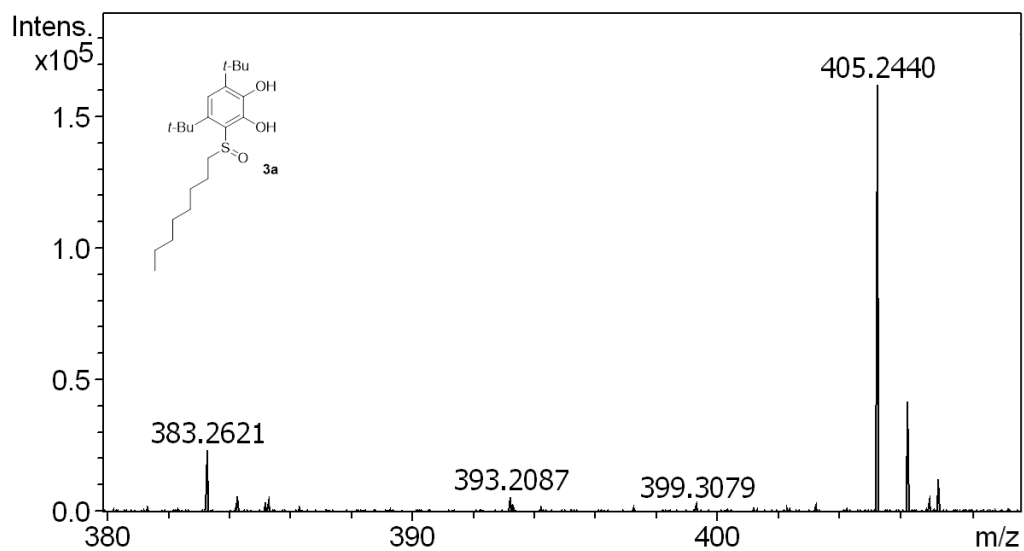

| Meas. m/z | # | Ion Formula                                        | m/z      | err [ppm] | mSigma | Score  | rdb | e <sup>-</sup> Conf | N-Rule |
|-----------|---|----------------------------------------------------|----------|-----------|--------|--------|-----|---------------------|--------|
| 405.2440  | 1 | C <sub>22</sub> H <sub>38</sub> NaO <sub>3</sub> S | 405.2434 | -1.6      | 4.5    | 100.00 | 3.5 | even                | ok     |

**Figure S23.** HRMS spectra of **3a**.

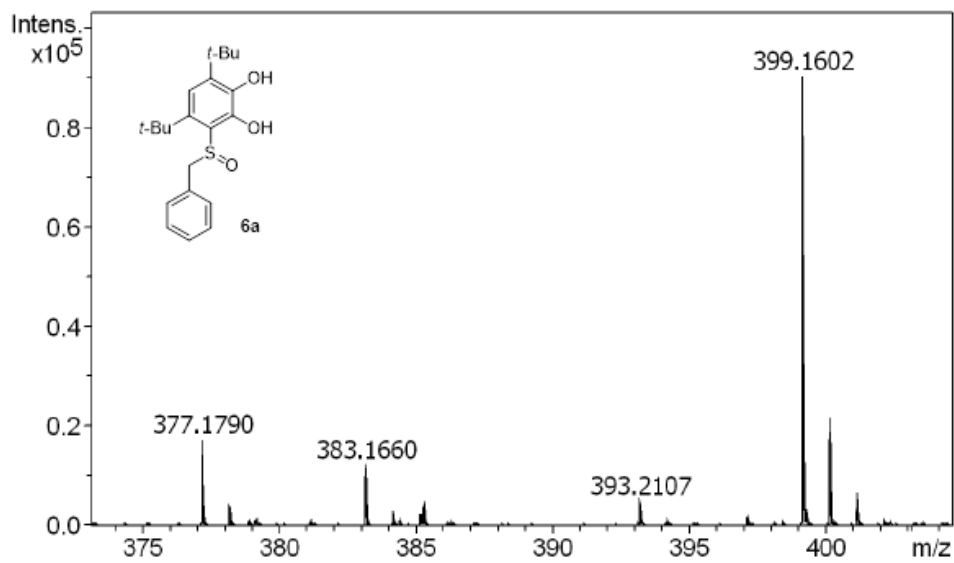

| Meas. m/z | # | Ion Formula                                        | m/z      | err [ppm] | mSigma | Score  | rdb | e <sup>-</sup> Conf | N-Rule |
|-----------|---|----------------------------------------------------|----------|-----------|--------|--------|-----|---------------------|--------|
| 399.1602  | 1 | C <sub>21</sub> H <sub>28</sub> NaO <sub>4</sub> S | 399.1601 | -0.3      | 3.5    | 100.00 | 7.5 | even                | ok     |

**Figure S24.** HRMS spectra of **6a**.

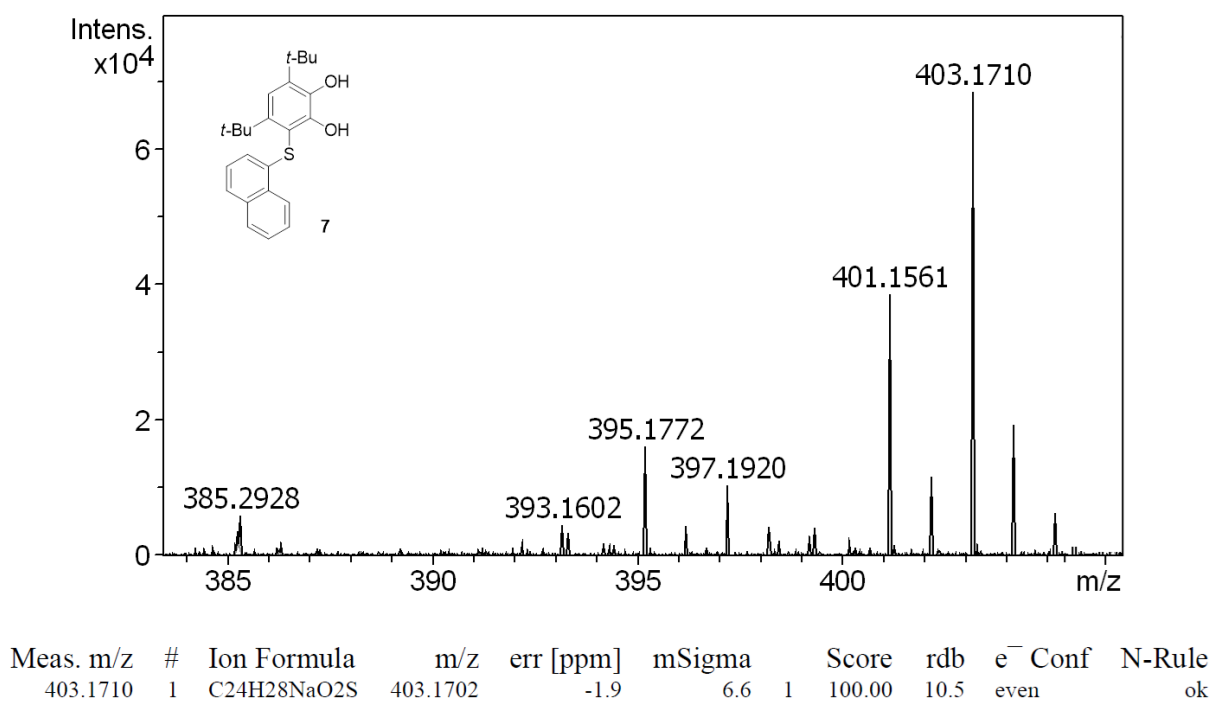

**Figure S25.** HRMS spectra of **7**.

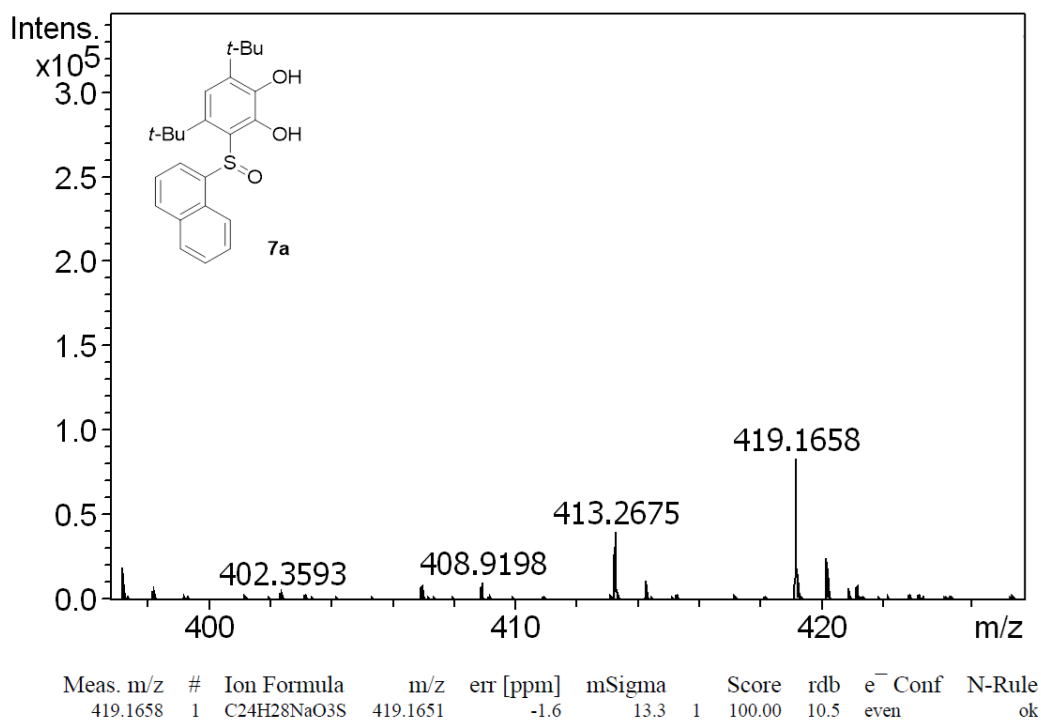

**Figure S26.** HRMS spectra of **7a**.

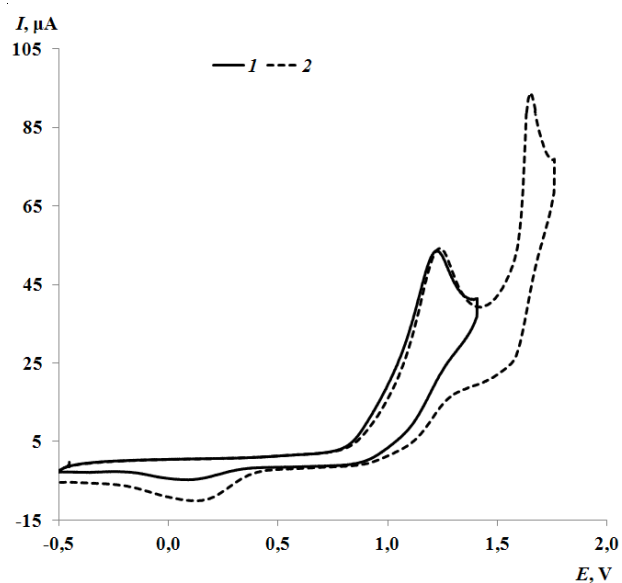

**Figure S27.** The CV curve of **2** at the potential range from  $-0.50$  to  $1.40$  V (*curve 1*); from  $-0.50$  to  $1.80$  V (*curve 2*) ( $\text{CH}_3\text{CN}$ , GC electrode,  $\text{Ag}/\text{AgCl}/\text{KCl}(\text{sat.})$ ,  $0.15$  M  $n\text{-Bu}_4\text{NClO}_4$ ,  $C = 3$   $\text{mmol}\cdot\text{L}^{-1}$ ).

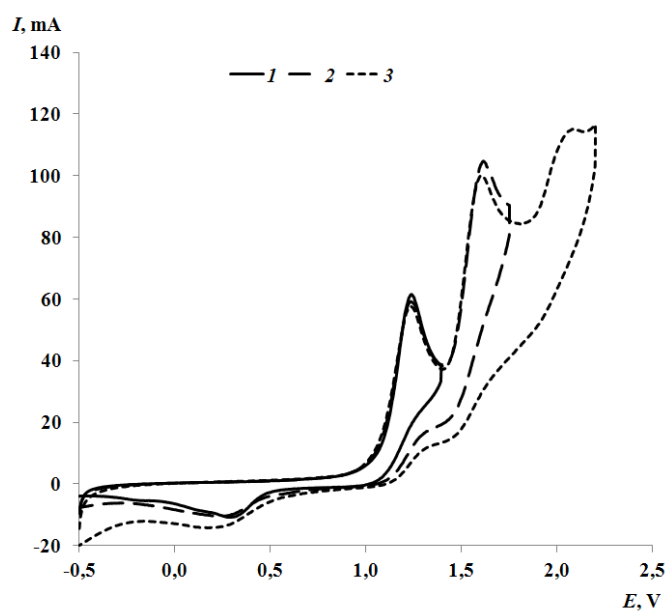

**Figure S28.** The CV curve of **2a** at the potential range from  $-0.50$  to  $1.40$  V (*curve 1*); from  $-0.50$  to  $1.70$  V (*curve 2*); from  $-0.50$  to  $2.20$  V (*curve 3*) ( $\text{CH}_3\text{CN}$ , GC electrode,  $\text{Ag}/\text{AgCl}/\text{KCl}(\text{sat.})$ ,  $0.15$  M  $n\text{-Bu}_4\text{NClO}_4$ ,  $C = 3$   $\text{mmol}\cdot\text{L}^{-1}$ ).

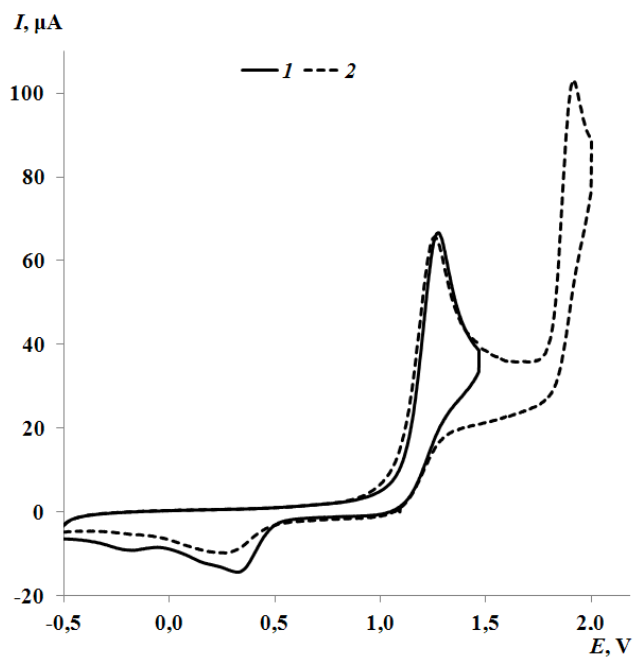

**Figure S29.** The CV curve of **3a** at the potential range from  $-0.50$  to  $1.50$  V (*curve 1*); from  $-0.50$  to  $2.10$  V (*curve 2*) ( $\text{CH}_3\text{CN}$ , GC electrode,  $\text{Ag}/\text{AgCl}/\text{KCl}(\text{sat.})$ ,  $0.15$  M  $n\text{-Bu}_4\text{NClO}_4$ ,  $C = 3 \text{ mmol}\cdot\text{L}^{-1}$ ).

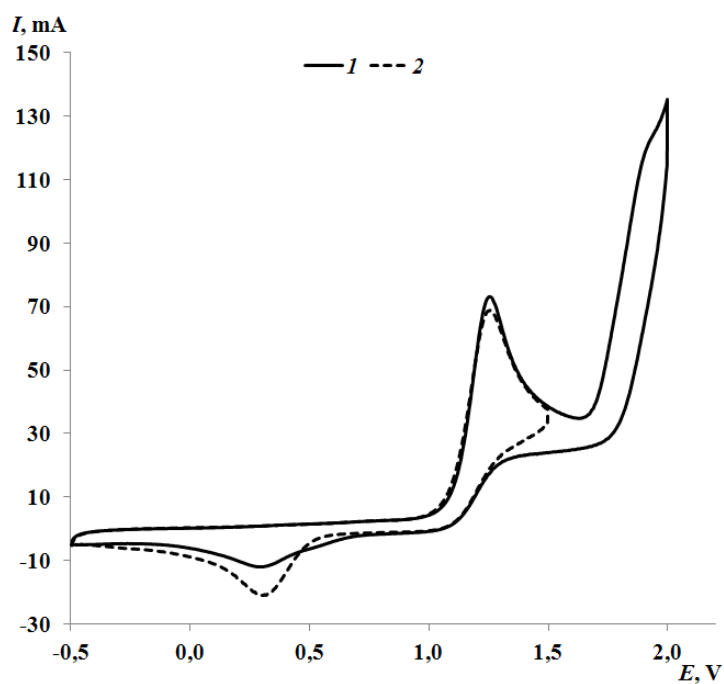

**Figure S30.** The CV curve of **4a** at the potential range from  $-0.5$  to  $1.5$  V (*curve 1*); from  $-0.5$  to  $2.0$  V (*curve 2*) ( $\text{CH}_3\text{CN}$ , GC electrode,  $\text{Ag}/\text{AgCl}/\text{KCl}(\text{sat.})$ ,  $0.15$  M  $n\text{-Bu}_4\text{NClO}_4$ ,  $C = 3 \text{ mmol}\cdot\text{L}^{-1}$ ).

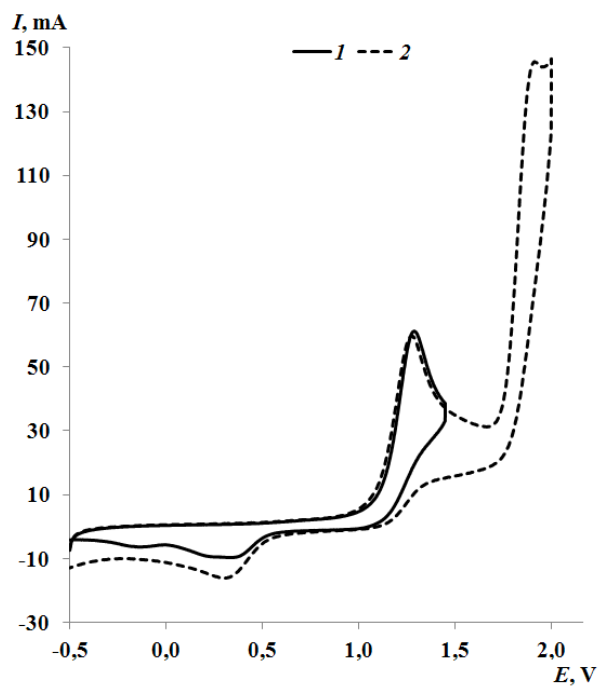

**Figure S31.** The CV curve of **6a** at the potential range from  $-0.50$  to  $1.50$  V (*curve 1*); from  $-0.50$  to  $1.20$  V (*curve 2*) ( $\text{CH}_3\text{CN}$ , GC electrode,  $\text{Ag}/\text{AgCl}/\text{KCl}(\text{sat.})$ ,  $0.15$  M  $n\text{-Bu}_4\text{NClO}_4$ ,  $C = 3 \text{ mmol}\cdot\text{L}^{-1}$ ).

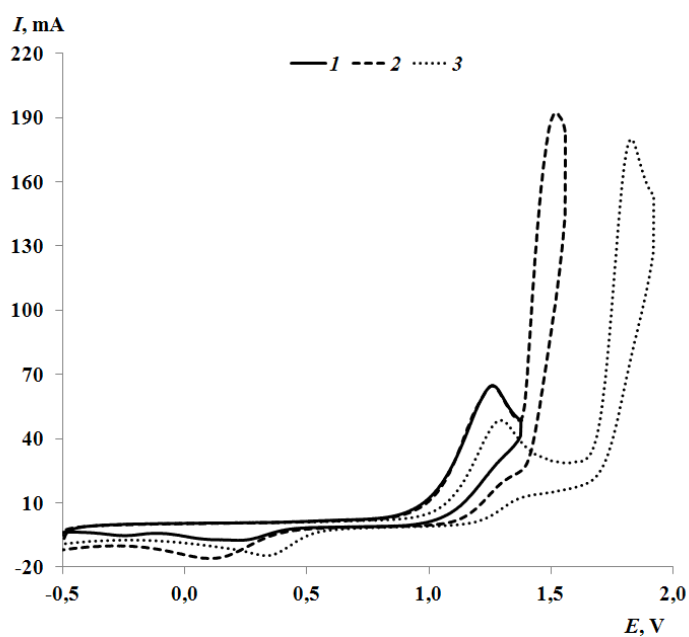

**Figure S32.** The CV curves of **7** and **7a** at the potential ranges: from  $-0.5$  to  $1.35$  V for **7** (*curve 1*); from  $-0.5$  to  $1.5$  V for **7** (*curve 2*); from  $-0.5$  to  $1.9$  V for **7a** (*curve 3*); ( $\text{CH}_3\text{CN}$ , GC electrode,  $\text{Ag}/\text{AgCl}/\text{KCl}(\text{sat.})$ ,  $0.15$  M  $n\text{-Bu}_4\text{NClO}_4$ ,  $C = 3 \text{ mmol}\cdot\text{L}^{-1}$ ).

## S5. UV–vis spectroscopy

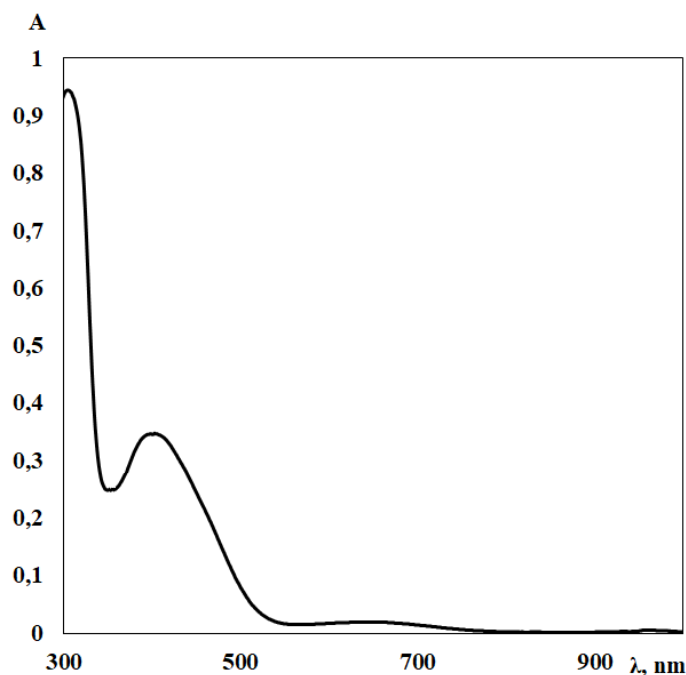

**Figure S33.** UV–vis spectra of the products of electrolysis of **5a** (MeCN, 293 K).

## S6. References

1. Smolyaninov, I.V., Pitikova, O.V., Poddel'sky, A.I., Berberova, N.T. *Russ. Chem. Bull.* **2018**, *67*, 1857–1867. <https://doi.org/10.1007/s11172-018-2299-9>.
2. Smolyaninov, I.V., Burmistrova, D.A., Arsenyev, M.V., Polovinkina, M.A., Pomortseva, N.P., Fukin, G.K., Poddel'sky, A.I., Berberova, N.T. *Molecules* **2022**, *27* (10), 3169. <https://doi.org/10.3390/molecules27103169>.
3. Gordon, A.J., Ford, R.A. *The chemist's companion*. A Wiley interscience publication, New York, **1972**, 541 pp.
4. J. Koziskova, F. Hahn, J. Richter, J. Kozisek, *Acta Chimica Slovaca*, 2016, *9*, 136.
5. Krause, L., Herbst-Irmer, R., Sheldrick G.M. & Stalke D., *J. Appl. Cryst.* **48** (2015) 3-10.
6. Sheldrick, G. M. SHELXS-2014, Program for Crystal Structure Solution; University of Göttingen: Göttingen, Germany, 2014.

7. Sheldrick, G. M. Crystal Structure Refinement with SHELXL. *Acta Crystallogr., Sect. A: Found. Crystallogr.* 2008, 64, 112–122.
8. Dolomanov, O. V.; Bourhis, L. J.; Gildea, R. J.; Howard, J. A. K.; Puschmann, H. OLEX2: a complete structure solution, refinement and analysis program. *J. Appl. Crystallogr.* 2009, 42, 339–341.
9. Bondet, V., Brand-Williams, W., Berset, C. *LWT - Food Sci. Technol.* **1997**, 30 (6), 609–615. <https://doi.org/10.1006/fstl.1997.0240>.
10. Smolyaninov, I.V., Antonova, N.A., Poddel'sky, A.I., Smolyaninova, S.A., Osipova, V.P., Berberova, N.T. *J. Organomet. Chem.* **2011**, 696 (13), 2611–2620. <https://doi.org/10.1016/j.jorganchem.2011.04.004>.
11. Re, R., Pellergrini, N., Proteggente, A., Pannala, A., Yang, M., Rice-Evans, C. *Free Radic. Biol. Med.* **1999**, 26, 1231–1237. [https://doi.org/10.1016/S0891-5849\(98\)00315-3](https://doi.org/10.1016/S0891-5849(98)00315-3).
12. Smolyaninov, I.V., Poddel'sky, A.I., Burmistrova, D.A., Voronina, Y.K., Pomortseva, N.P., Polovinkina, M.A., Almyasheva, N.R., Zamkova, M.A., Berberova, N.T., Eremenko, I.L. *Int. J. Mol. Sci.* **2023**, 24 (9), 8319. <https://doi.org/10.3390/ijms24098319>.
